# Supplementary material for: Digging into the admixture strata of current-day Canary Islanders based on mitogenomes
Source: PubMed Central journal article supplement — iScience. 2022 Dec 29;26(1):105907. doi: 10.1016/j.isci.2022.105907 (PMC9840145; doi:10.1016/j.isci.2022.105907), 2022-12-29
Supplement: mmc1.pdf [file mmc1.pdf]

## **Supplemental information**

### **Digging into the admixture strata of current-day**

#### **Canary Islanders based on mitogenomes**

**Víctor García-Olivares, Luis A. Rubio-Rodríguez, Adrián Muñoz-Barrera, Ana Díaz-de Usera, David Jáspez, Antonio Iñigo-Campos, María Del Cristo Rodríguez Pérez, Antonio Cabrera de León, José M. Lorenzo-Salazar, Rafaela González-Montelongo, Vicente M. Cabrera, and Carlos Flores**

**Table S1.** Within-island matches between aboriginal and current-day Canary mtDNA lineages, including number of samples and frequencies (%). Lineages detected exclusively in aboriginal samples were marked with an asterisk. Related to the main text and methods.

| Islands    | El Hierro  |             | La Palma   |             | La Gomera  |             | Tenerife   |             | Gran Canaria |             | Fuerteventura |             | Lanzarote  |             | HVR Diagnostic positions (-16000)       | Regions                                | References                     |
|------------|------------|-------------|------------|-------------|------------|-------------|------------|-------------|--------------|-------------|---------------|-------------|------------|-------------|-----------------------------------------|----------------------------------------|--------------------------------|
|            | Aboriginal | Present-Day | Aboriginal | Present-Day | Aboriginal | Present-Day | Aboriginal | Present-Day | Aboriginal   | Present-Day | Aboriginal    | Present-Day | Aboriginal | Present-Day |                                         |                                        |                                |
| H+16096    |            |             |            |             |            |             |            |             | 1,(011)      |             |               |             |            |             | 86                                      | Tunisia                                | 1                              |
| H+16172    |            | 1,(006)     |            |             | 1,(016)    |             |            | 1,(002)     |              | 3,(009)     |               |             |            |             | 172                                     | Morocco, West Sahara, Mauritania       | 1–3                            |
| H1+16189   |            |             |            |             |            | 2,(010)     | 1,(021)    | 5,(010)     |              | 1,(003)     |               | 3,(025)     |            |             | 189                                     | Algeria, Tunisia, Tuareg               | 4–6                            |
| H1+16239   |            |             |            |             |            |             |            |             | 1,(011)      |             |               |             |            |             | 239                                     | Morocco, France, Italy                 | 7–9                            |
| H+16290    |            |             | 1,(04)     | 2,(010)     |            |             |            |             |              |             |               |             |            |             | 290                                     | West Sahara, Morocco                   | 10,11                          |
| H+16291    |            |             |            |             |            | 1,(005)     |            | 1,(021)     |              |             |               | 1,(008)     |            |             | 291                                     | Mauritania                             | 2                              |
| H+16311    |            |             |            | 1,(005)     |            | 1,(005)     | 2,(043)    | 2,(004)     |              |             |               |             | 1,(005)    |             | 311                                     | Morocco, Algeria, Tunisia              | 3,5,6                          |
| H+16362    |            | 1,(006)     |            | 1,(005)     |            |             |            | 2,(004)     | 3,(034)      | 4,(011)     |               |             | 1,(008)    |             |                                         |                                        |                                |
| H1e1a      |            | 1,(006)     |            | 1,(005)     |            | 3,(014)     |            | 4,(006)     | 1,(011)      | 9,(026)     |               | 2,(32)      | 5,(041)    | 6,(030)     |                                         | Basque Country, Portugal, Italy        | 12–15                          |
| H1a0       |            | 4,(023)     |            |             |            | 1,(005)     | 1,(021)    | 2,(004)     | 3,(034)      |             |               | 1,(17)      |            |             | 278                                     | Portugal                               | Greenspan, GQ334714            |
| H1bw       |            |             | 1,(04)     |             |            | 1,(005)     | 1,(021)    | 2,(004)     | 1,(011)      |             |               |             |            |             | 316                                     | Andalusia                              | 16                             |
| H1cf       | 61,(97)    | 7,(041)     | 6,(26)     | 5,(026)     | 2,(033)    | 3,(014)     | 5,(107)    | 17,(035)    | 2,(023)      | 6,(017)     |               | 9,(074)     |            | 8,(041)     | 260                                     | Morocco, Tunisia, Algeria              | 1,17,18                        |
| H1cf+16278 |            |             | 1,(04)     |             |            |             |            |             |              |             |               |             |            |             | 278                                     |                                        |                                |
| H2a        |            |             |            |             |            |             |            |             | 1,(011)      | 1,(002)     |               |             |            |             |                                         | Hungary                                | LS997685                       |
| H3         |            |             |            |             |            |             |            |             | 2,(023)      | 4,(011)     |               |             | 1,(008)    | 1,(005)     |                                         | Basque Country                         | 19                             |
| H3r+16126  |            |             |            |             |            | 3,(014)     | 1,(021)    | 5,(010)     |              |             |               |             | 1,(17)     |             | 126                                     | Morocco, Finland                       | <sup>6</sup> , FTDNA, JN112339 |
| H3r+16260  |            |             |            |             |            |             | 1,(021)    | 1,(002)     |              |             |               |             |            |             | 260                                     |                                        |                                |
| H4a1       |            | 1,(006)     |            | 1,(005)     |            |             |            | 1,(002)     | 3,(034)      | 6,(017)     |               | 1,(008)     | 1,(17)     | 1,(005)     | 362                                     | Morocco, Sahara, Algeria, Italy, Egypt | 3,5,10,20                      |
| HV         |            |             |            |             |            |             | *          |             |              |             |               |             |            |             | 189 316                                 | Iraq, Lebanon                          | 21,22                          |
| HV1        |            |             |            |             | 1,(016)    |             |            |             |              |             |               |             |            |             | 67                                      | Morocco, Tunisia, Algeria              | 3,22                           |
| I          |            |             |            |             | 1,(016)    | 2,(010)     | 1,(021)    | 1,(002)     |              |             |               |             |            |             | 092 278                                 |                                        |                                |
| I1         |            |             |            |             | 1,(016)    | 1,(005)     |            |             |              |             |               | 3,(025)     |            |             | 311                                     | Tunisia                                | 23                             |
| J1c3       |            |             |            |             |            |             | 1,(021)    |             |              |             |               |             |            |             |                                         | Sardinia, Umbria                       | 9,24                           |
| J1c2e2     |            |             |            |             |            |             | 1,(021)    | 5,(010)     |              |             |               |             |            |             | 069 126 278 366                         | Basque Country, Sardinia               | 24,25                          |
| J2a2d1a    |            | 25,(146)    | 3,(13)     | 3,(016)     | 5,(082)    | 8,(039)     | 3,(065)    | 4,(008)     | 2,(023)      | 17,(048)    |               | 1,(008)     |            | 6,(030)     | 145 207 243 311 318C                    | Tunisia                                | 26                             |
| K1a        |            | 2,(012)     | 1,(04)     |             |            |             | 1,(021)    | 7,(014)     | 1,(011)      | 7,(014)     |               |             |            | 1,(005)     | 093 189 224 311                         | Morocco, Iraq, Switzerland             | 27–29                          |
| K2a5a1     |            |             |            |             |            |             |            |             | 1,(011)      |             |               |             |            |             | 235                                     | Morocco, Portugal                      | 3,13                           |
| L1b1a      |            |             | 1,(04)     | 1,(005)     | 1,(016)    |             |            |             | 2,(023)      | 5,(014)     |               | 1,(008)     |            |             | 126 145 187 189 223 264 270 278 293 311 | Morocco                                | 30                             |
| L2         |            |             |            |             |            |             |            |             |              | 1,(011)     |               |             |            |             | 145 213 223                             | Chad                                   | 31                             |
| L2c        |            |             | 1,(04)     |             |            | 1,(005)     |            | 1,(002)     |              |             |               |             |            |             | 223 278 390                             | Mauritania                             | 32                             |
| L2d2       |            |             |            |             |            |             | 1,(021)    |             |              |             |               |             |            |             | 114A 145 184 223 239 278 292 311        | Cabo Verde                             | 33                             |

|                     |                |                |                |                 |                 |               |                |          |          |                                                     |                                           |                                                          |                                                          |                |      |
|---------------------|----------------|----------------|----------------|-----------------|-----------------|---------------|----------------|----------|----------|-----------------------------------------------------|-------------------------------------------|----------------------------------------------------------|----------------------------------------------------------|----------------|------|
| L2e2                |                |                |                | 2,(043)         |                 |               | 1,(003)        |          |          | 111A 145 184 223 239 278<br>292 311 355 390 399 400 | Tunisia, Cabo Verde, Sao<br>Tome Principe | 23,33,34                                                 |                                                          |                |      |
| L3b1a               |                | 2,(010)        |                | 1,(005)         |                 | 5,(010)       | 5,(056)        | 3,(009)  |          | 1241 223 278 362                                    | Morocco, Algeria                          | 11,35                                                    |                                                          |                |      |
| L3d                 |                |                |                | 1,(016)         |                 | 1,(021)       |                | 1,(003)  | 1,(008)  | 124 223 257                                         | Morocco, West Sahara,<br>Sierra Leone     | 11,16,17                                                 |                                                          |                |      |
| L3d1b3a             |                |                |                | 4,(066)         | 4,(019)         |               |                |          |          | 256                                                 | Morocco                                   | 11                                                       |                                                          |                |      |
| L3e1                |                |                |                |                 |                 |               | 1,(011)        |          |          | 187 223 327                                         | Chad                                      | 31                                                       |                                                          |                |      |
| L3e2                |                |                |                |                 |                 |               | 1,(011)        |          |          | 126 223 262 320                                     | Algeria                                   | 5                                                        |                                                          |                |      |
| L3e2L2c             |                |                |                |                 |                 | *             |                |          |          | 081 093 175 223 278 320                             | Sao Tome Principe                         | 34                                                       |                                                          |                |      |
| M1b1                |                |                |                |                 |                 | 1,(002)       | 1,(011)        | 2,(006)  | 1,(008)  | 4,(020)                                             | 129 185 189 223 249 311                   | Morocco, Sahara, Algeria                                 | 5,10,11                                                  |                |      |
| N1b1a7              |                |                |                | 1,(016)         |                 |               |                |          |          |                                                     | 145 176G 223 297 311<br>(390)             | Armenia                                                  | Greenspan, JF265069                                      |                |      |
| R0a                 |                |                |                |                 |                 | 1,(021)       | 1,(002)        |          |          |                                                     | 126 362                                   | Morocco, Algeria                                         | 3,5                                                      |                |      |
| T1a                 | 5,(029)        | 1,(04)         | 6,(031)        | 15,(072)        |                 | 10,(021)      | 1,(011)        | 3,(009)  | 7,(057)  | 5,(025)                                             | 126 163 186 189 294                       | Morocco, Algeria, Tunisia                                | 1,5,10                                                   |                |      |
| T2b                 |                | 7,(037)        |                | 2,(010)         |                 | 5,(010)       | 4,(045)        | 2,(005)  |          | 3,(015)                                             | 304 241                                   | Morocco, Algeria, Tunisia                                | 1,5,7                                                    |                |      |
| T2c                 |                |                |                |                 |                 | 1,(021)       |                |          |          |                                                     | 126 224 292 294                           | France, Romania                                          | 36,37                                                    |                |      |
| T2c1d               |                | 3,(13)         |                | 3,(015)         |                 | 10,(215)      | 6,(012)        | 15,(169) | 13,(037) | 1,(17)                                              | 4,(033)                                   | 15,(077)                                                 | 399                                                      | Tunisia        | 26   |
| T2c1d+16255         |                |                |                |                 |                 |               |                |          |          | 1,(17)                                              |                                           |                                                          | 255                                                      |                |      |
| U1a2a               |                |                |                |                 |                 | 1,(021)       |                |          |          |                                                     |                                           |                                                          |                                                          |                |      |
| U5                  |                |                |                |                 |                 |               | 1,(011)        |          |          | 1,(005)                                             | 270                                       | Algeria, Mauritania                                      | 2,5                                                      |                |      |
| U5a1b4              | 1,(015)        | 16,(094)       |                |                 |                 |               |                |          |          |                                                     | 093 192 256 270 362 399                   | Denmark                                                  | 38                                                       |                |      |
| U5a2a               |                |                | 1,(005)        |                 |                 |               | 2,(004)        | 1,(011)  |          |                                                     | 294                                       | Morocco                                                  | 10                                                       |                |      |
| U5b1                |                |                | 1,(005)        | 1,(005)         |                 |               | 2,(004)        | 2,(006)  | 2,(017)  | 1,(17)                                              | 1,(005)                                   | 189 1921                                                 | Morocco, Tunisia,<br>Mauritania                          | 1,2,39         |      |
| U5b1+16192          |                |                | 1,(005)        | 5,(024)         |                 |               | 9,(019)        | 1,(011)  | 5,(014)  | 2,(017)                                             | 189 192                                   | Morocco, West Sahara,<br>Mauritania                      | 2,10,39                                                  |                |      |
| U6a                 | 1,(006)        |                |                |                 |                 |               | 2,(004)        | 3,(034)  | 1,(003)  |                                                     | 1,(005)                                   | 172 219 278                                              | Morocco, West Sahara,<br>Mauritania, Tunisia,<br>Algeria | 1,5,10         |      |
| U6a1                |                |                |                |                 |                 |               |                | 1,(011)  |          |                                                     |                                           | 172 219 221 224 278                                      | Andalusia                                                | 40             |      |
| U6a1a               | 1,(006)        |                |                |                 |                 | 1,(021)       | 1,(002)        | 1,(011)  | 1,(003)  | 1,(008)                                             | 172 189 219 278                           | Morocco, West Sahara,<br>Mauritania, Tunisia,<br>Algeria | 2,5,10,41                                                |                |      |
| U6a1a1              |                |                |                |                 |                 | 1,(021)       | 2,(004)        | 2,(023)  |          | 3,(49)                                              | 239                                       | Morocco, Tunisia, Algeria                                | 3,5,41                                                   |                |      |
| U6a3                | 1,(006)        |                |                | 2,(010)         |                 |               | 5,(010)        | 1,(011)  | 1,(003)  | 1,(008)                                             | 1,(005)                                   |                                                          | Morocco, Tunisia                                         | 10,41          |      |
| U6a7a1              |                |                | 4,(021)        |                 |                 |               | 1,(002)        | 1,(011)  |          |                                                     |                                           | 15530 15632                                              |                                                          |                |      |
| U6b                 |                |                |                |                 |                 | 1,(021)       |                |          |          |                                                     |                                           |                                                          | Morocco, Tunisia, Surdan                                 | 3,41,42        |      |
| U6b1a               | 29,(170)       | 2,(08)         | 25,(131)       | 34,(559)        | 75,(361)        | 5,(107)       | 28,(058)       | 5,(056)  | 29,(083) | 11,(090)                                            | 32,(163)                                  | 163                                                      | Lebanon                                                  | 43             |      |
| U6b1a+16092         | 11,(064)       |                | 1,(005)        | 3,(050)         | 13,(063)        |               | 7,(014)        | 7,(079)  |          | 2,(017)                                             | 10,(051)                                  | 92                                                       |                                                          |                |      |
| U6b1a1              | 3,(018)        |                | 2,(010)        | 1,(016)         | 1,(005)         |               | 2,(004)        | 4,(045)  |          |                                                     | 1,(005)                                   | 48                                                       |                                                          |                |      |
| U6c1                | 2,(012)        |                | 4,(021)        |                 | 2,(010)         |               | 7,(014)        | 5,(056)  | 6,(017)  | 1,(17)                                              | 8,(066)                                   | 6,(031)                                                  | 129 169                                                  | Tunisia, Italy | 9,44 |
| U6c1+16213          |                |                |                |                 |                 |               |                | 1,(011)  | 1,(003)  |                                                     |                                           | 213                                                      |                                                          |                |      |
| U7                  | 1,(015)        |                |                |                 |                 |               |                |          |          |                                                     |                                           | 309 318T                                                 | Egypt                                                    | 45             |      |
| V                   | 2,(012)        |                |                | 1,(016)         |                 | 1,(021)       | 6,(012)        |          | 2,(006)  | 1,(008)                                             | 298                                       | Morocco, Mauritania,<br>Tunisia, Algeria                 | 1,2,5,10                                                 |                |      |
| W1e1L3f1b1          |                | 1,(04)         | 3,(016)        |                 |                 |               |                |          |          |                                                     | 295                                       | Morocco                                                  | 11                                                       |                |      |
| X3a                 |                | 2,(08)         | 5,(026)        | 4,(066)         | 1,(005)         | 1,(021)       | 3,(006)        | 2,(023)  | 4,(011)  |                                                     |                                           | 15672 189 223 278 (390)                                  | Morocco, Tunisia, Algeria                                | 5,10,41        |      |
| Aboriginal<br>(N)   | 63             | 24             | 61             | 47              | 89              | 6             | 6              |          |          |                                                     |                                           |                                                          |                                                          |                |      |
| Current-day<br>(N*) | 106 + 65 = 171 | 104 + 87 = 191 | 137 + 71 = 208 | 188 + 295 = 483 | 216 + 134 = 350 | 55 + 67 = 122 | 112 + 84 = 196 |          |          |                                                     |                                           |                                                          |                                                          |                |      |

\* (Complete + partial sequences)

## References

1. Ennaffaa, H., Fregel, R., Khodjet-EI-Khil, H., González, A.M., Mahmoudi, H.A.E., Cabrera, V.M., Larruga, J.M., and Benammar-Elgaaïed, A. (2011). Mitochondrial DNA and Y-chromosome microstructure in Tunisia. *J. Hum. Genet.* *56*, 734–741. 10.1038/jhg.2011.92.
2. González, A.M., Cabrera, V.M., Larruga, J.M., Tounkara, A., Noumsi, G., Thomas, B.N., and Moulds, J.M. (2006). Mitochondrial DNA variation in Mauritania and Mali and their genetic relationship to other Western Africa populations. *Ann. Hum. Genet.* *70*, 631–657. 10.1111/j.1469-1809.2006.00259.x.
3. Rhouda, T., Martínez-Redondo, D., Gómez-Durán, A., Elmtili, N., Idaomar, M., Díez-Sánchez, C., Montoya, J., López-Pérez, M.J., and Ruiz-Pesini, E. (2009). Moroccan mitochondrial genetic background suggests prehistoric human migrations across the Gibraltar Strait. *Mitochondrion* *9*, 402–407. 10.1016/j.mito.2009.07.003.
4. Pereira, L., Černý, V., Cerezo, M., Silva, N.M., Hájek, M., Vašíková, A., Kujanová, M., Brdička, R., and Salas, A. (2010). Linking the sub-Saharan and West Eurasian gene pools: maternal and paternal heritage of the Tuareg nomads from the African Sahel. *European Journal of Human Genetics* *18*, 915–923. 10.1038/ejhg.2010.21.
5. Bekada, A., Fregel, R., Cabrera, V.M., Larruga, J.M., Pestano, J., Benhamamouch, S., and González, A.M. (2013). Introducing the Algerian mitochondrial DNA and Y-chromosome profiles into the North African landscape. *PLoS One* *8*, e56775. 10.1371/journal.pone.0056775.
6. Kefi, R., Hsouna, S., Ben Halim, N., Lasram, K., Romdhane, L., Messai, H., and Abdelhak, S. (2015). Phylogeny and genetic structure of Tunisians and their position within Mediterranean populations. *Mitochondrial DNA* *26*, 593–604. 10.3109/19401736.2013.879649.
7. Kefi, R., Hechmi, M., Naouali, C., Jmel, H., Hsouna, S., Bouzaid, E., Abdelhak, S., Beraud-Colomb, E., and Stevanovitch, A. (2018). On the origin of Iberomausians: new data based on ancient mitochondrial DNA and phylogenetic analysis of Afalou and Taforalt populations. *Mitochondrial DNA A DNA Mapp Seq Anal* *29*, 147–157. 10.1080/24701394.2016.1258406.
8. Dubut, V., Chollet, L., Murail, P., Cartault, F., Béraud-Colomb, E., Serre, M., and Mogentale-Profizi, N. (2004). mtDNA polymorphisms in five French groups: importance of regional sampling. *Eur. J. Hum. Genet.* *12*, 293–300. 10.1038/sj.ejhg.5201145.
9. Modi, A., Lancioni, H., Cardinali, I., Capodiferro, M.R., Migliore, N.R., Hussein, A., Strobl, C., Bodner, M., Schnaller, L., Xavier, C., et al. (2020). The mitogenome portrait of Umbria in Central Italy as depicted by contemporary inhabitants and pre-Roman remains. *Scientific Reports* *10*. 10.1038/s41598-020-67445-0.
10. Rando, J.C., Pinto, F., González, A.M., Hernández, M., Larruga, J.M., Cabrera, V.M., and Bandelt, H.J. (1998). Mitochondrial DNA analysis of northwest African populations reveals genetic exchanges with European, near-eastern, and sub-Saharan populations. *Ann. Hum. Genet.* *62*, 531–550. 10.1046/j.1469-1809.1998.6260531.x.
11. Aboukhalid, R., Sturk-Andreaggi, K., Bouabdellah, M., Squalli, D., Irwin, J.A., and Amzazi, S. (2013). Mitochondrial DNA control region variation from samples of the Moroccan population. *Int. J. Legal Med.* *127*, 757–759. 10.1007/s00414-012-0813-4.
12. Pereira, L., Gonçalves, J., Franco-Duarte, R., Silva, J., Rocha, T., Arnold, C., Richards, M., and Macaulay, V. (2007). No Evidence for an mtDNA Role in Sperm Motility: Data from Complete Sequencing of Asthenozoospermic Males. *Molecular Biology and Evolution* *24*, 868–874. 10.1093/molbev/msm004.
13. Behar, D.M., Hamant, C., Manry, J., van Oven, M., Haak, W., Martínez-Cruz, B., Salaberria, J., Oyharçabal, B., Bauduer, F., Comas, D., et al. (2012). The Basque paradigm: genetic evidence of a maternal continuity in the Franco-Cantabrian region since pre-Neolithic times. *Am. J. Hum. Genet.* *90*, 486–493. 10.1016/j.ajhg.2012.01.002.
14. Bodner, M., Iuvaro, A., Strobl, C., Nagl, S., Huber, G., Pelotti, S., Pettener, D., Luiselli, D., and Parson, W. (2015). Helena, the hidden beauty: Resolving the most common West Eurasian mtDNA control region haplotype by massively parallel sequencing an Italian population sample. *Forensic Sci. Int. Genet.* *15*, 21–26. 10.1016/j.fsigen.2014.09.012.
15. Diroma, M.A., Modi, A., Lari, M., Sineo, L., Caramelli, D., and Vai, S. (2021). New Insights Into Mitochondrial DNA Reconstruction and Variant Detection in Ancient Samples. *Front. Genet.* *12*, 619950. 10.3389/fgene.2021.619950.
16. Hernández, C.L., Soares, P., Dugoujon, J.M., Novelletto, A., Rodríguez, J.N., Rito, T., Oliveira, M., Melhaoui, M., Baali, A., Pereira, L., et al. (2015). Early Holocene and Historic mtDNA African Signatures in the Iberian Peninsula: The Andalusian Region as a Paradigm. *PLoS One* *10*, e0139784. 10.1371/journal.pone.0139784.
17. Brakez, Z., Bosch, E., Izaabel, H., Akhayat, O., Comas, D., Bertranpetit, J., and Calafell, F. (2001). Human mitochondrial DNA sequence variation in the Moroccan population of the Souss area. *Annals of Human Biology* *28*, 295–307. 10.1080/030144601300119106.
18. Fregel, R., Pestano, J., Amay, M., Cabrera, V.M., Larruga, J.M., and González, A.M. (2009). The maternal aborigine colonization of La Palma (Canary Islands). *Eur. J. Hum. Genet.* *17*, 1314–1324. 10.1038/ejhg.2009.46.

19. García, Ó., Alonso, S., Huber, N., Bodner, M., and Parson, W. (2020). Forensically relevant phylogeographic evaluation of mitogenome variation in the Basque Country. *Forensic Sci. Int. Genet.* *46*, 102260. 10.1016/j.fsigen.2020.102260.
20. Drosou, K., Collin, T.C., Freeman, P.J., Loynes, R., and Freemont, T. (2020). The first reported case of the rare mitochondrial haplotype H4a1 in ancient Egypt. *Sci. Rep.* *10*, 17037. 10.1038/s41598-020-74114-9.
21. Al-Zahery, N., Semino, O., Benuzzi, G., Magri, C., Passarino, G., Torrioni, A., and Santachiara-Benerecetti, A.S. (2003). Y-chromosome and mtDNA polymorphisms in Iraq, a crossroad of the early human dispersal and of post-Neolithic migrations. *Mol. Phylogenet. Evol.* *28*, 458–472. 10.1016/s1055-7903(03)00039-3.
22. Badro, D.A., Douaihy, B., Haber, M., Youhanna, S.C., Salloum, A., Ghassibe-Sabbagh, M., Johnsrud, B., Khazen, G., Matisoo-Smith, E., Soria-Hernanz, D.F., et al. (2013). Y-chromosome and mtDNA genetics reveal significant contrasts in affinities of modern Middle Eastern populations with European and African populations. *PLoS One* *8*, e54616. 10.1371/journal.pone.0054616.
23. Costa, M.D., Cherni, L., Fernandes, V., Freitas, F., Ammar el Gaaied, A.B., and Pereira, L. (2009). Data from complete mtDNA sequencing of Tunisian centenarians: Testing haplogroup association and the “golden mean” to longevity. *Mech. Ageing Dev.* *130*, 222–226. 10.1016/j.mad.2008.12.001.
24. Olivieri, A., Sidore, C., Achilli, A., Angius, A., Posth, C., Furtwängler, A., Brandini, S., Capodiferro, M.R., Gandini, F., Zoledziwska, M., et al. (2017). Mitogenome Diversity in Sardinians: A Genetic Window onto an Island’s Past. *Molecular Biology and Evolution* *34*, 1230–1239. 10.1093/molbev/msx082.
25. Cardoso, S., Valverde, L., Alfonso-Sánchez, M.A., Palencia-Madrid, L., Elcoroaristizabal, X., Algorta, J., Catarino, S., Arteta, D., Herrera, R.J., Zarrabeitia, M.T., et al. (2013). The Expanded mtDNA Phylogeny of the Franco-Cantabrian Region Upholds the Pre-Neolithic Genetic Substrate of Basques. *PLoS ONE* *8*, e67835. 10.1371/journal.pone.0067835.
26. Pereira, J.B., Costa, M.D., Vieira, D., Pala, M., Bamford, L., Harich, N., Cherni, L., Alshamali, F., Hatina, J., Rychkov, S., et al. (2017). Reconciling evidence from ancient and contemporary genomes: a major source for the European Neolithic within Mediterranean Europe. *Proceedings of the Royal Society B: Biological Sciences* *284*, 20161976. 10.1098/rspb.2016.1976.
27. Plaza, S., Calafell, F., Helal, A., Bouzerna, N., Lefranc, G., Bertranpetit, J., and Comas, D. (2003). Joining the pillars of Hercules: mtDNA sequences show multidirectional gene flow in the western Mediterranean. *Ann. Hum. Genet.* *67*, 312–328. 10.1046/j.1469-1809.2003.00039.x.
28. Shamooun-Pour, M., Li, M., and Andrew Merriwether, D. (2019). Rare human mitochondrial HV lineages spread from the Near East and Caucasus during post-LGM and Neolithic expansions. *Scientific Reports* *9*. 10.1038/s41598-019-48596-1.
29. Furtwängler, A., Rohrlach, A.B., Lamnidis, T.C., Papac, L., Neumann, G.U., Siebke, I., Reiter, E., Steuri, N., Hald, J., Denaire, A., et al. (2020). Ancient genomes reveal social and genetic structure of Late Neolithic Switzerland. *Nat. Commun.* *11*, 1915. 10.1038/s41467-020-15560-x.
30. Cerezo, M., Achilli, A., Olivieri, A., Perego, U.A., Gómez-Carballa, A., Brisighelli, F., Lancioni, H., Woodward, S.R., López-Soto, M., Carracedo, A., et al. (2012). Reconstructing ancient mitochondrial DNA links between Africa and Europe. *Genome Res.* *22*, 821–826. 10.1101/gr.134452.111.
31. Cerný, V., Salas, A., Hájek, M., Zaloudková, M., and Brdicka, R. (2007). A bidirectional corridor in the Sahel-Sudan belt and the distinctive features of the Chad Basin populations: a history revealed by the mitochondrial DNA genome. *Ann. Hum. Genet.* *71*, 433–452. 10.1111/j.1469-1809.2006.00339.x.
32. Maca-Meyer, N., González, A.M., Larruga, J.M., Flores, C., and Cabrera, V.M. (2001). Major genomic mitochondrial lineages delineate early human expansions. *BMC Genet.* *2*, 13. 10.1186/1471-2156-2-13.
33. Brehm, A., Pereira, L., Bandelt, H.-J., Prata, M.J., and Amorim, A. (2002). Mitochondrial portrait of the Cabo Verde archipelago: the Senegambian outpost of Atlantic slave trade. *Ann. Hum. Genet.* *66*, 49–60. 10.1017/S0003480001001002.
34. Trovoada, M.J., Pereira, L., Gusmão, L., Abade, A., Amorim, A., and Prata, M.J. (2004). Pattern of mtDNA variation in three populations from São Tomé e Príncipe. *Ann. Hum. Genet.* *68*, 40–54. 10.1046/j.1529-8817.2003.00070.x.
35. Côrte-Real, H.B.S.M., Macaulay, V.A., Richards, M.B., Hariti, G., Issad, M.S., Cambon-Thomsen, A., Papiha, S., Bertranpetit, J., and Sykes, B.C. (1996). Genetic diversity in the Iberian Peninsula determined from mitochondrial sequence analysis. *Ann. Hum. Genet.* *60*, 331–350. 10.1111/j.1469-1809.1996.tb01196.x.
36. Richard, C., Richard, C., Pennarun, E., Kivisild, T., Tambets, K., Tolk, H.-V., Metspalu, E., Reidla, M., Chevalier, S., Giraudet, S., et al. (2007). An mtDNA perspective of French genetic variation. *Annals of Human Biology* *34*, 68–79. 10.1080/03014460601076098.
37. Cocos, R., Schipor, S., Hervella, M., Cianga, P., Popescu, R., Bănescu, C., Constantinescu, M., Martinescu, A., and Raicu, F. (2017). Genetic affinities among the historical provinces of Romania and Central Europe as revealed by an mtDNA analysis. *BMC Genet.* *18*, 20. 10.1186/s12863-017-0487-5.
38. Li, S., Besenbacher, S., Li, Y., Kristiansen, K., Grarup, N., Albrechtsen, A., Sparsø, T., Korneliussen, T., Hansen, T., Wang, J., et al. (2014). Variation and association to diabetes in 2000 full mtDNA sequences mined from an exome study in a Danish population. *Eur. J. Hum. Genet.* *22*, 1040–1045. 10.1038/ejhg.2013.282.

39. Harich, N., Costa, M.D., Fernandes, V., Kandil, M., Pereira, J.B., Silva, N.M., and Pereira, L. (2010). The trans-Saharan slave trade - clues from interpolation analyses and high-resolution characterization of mitochondrial DNA lineages. *BMC Evol. Biol.* *10*, 138. 10.1186/1471-2148-10-138.
40. Álvarez-Cubero, M.J., Saiz Guinaldo, M., Martínez-González, L.J., Álvarez Merino, J.C., Cózar Olmo, J.M., and Acosta, J.A.L. (2012). Mitochondrial haplogroups and polymorphisms reveal no association with sporadic prostate cancer in a southern European population. *PLoS One* *7*, e41201. 10.1371/journal.pone.0041201.
41. Cherni, L., Loueslati, B.Y., Pereira, L., Ennafaâ, H., Amorim, A., and El Gaied, A.B.A. (2005). Female gene pools of Berber and Arab neighboring communities in central Tunisia: microstructure of mtDNA variation in North Africa. *Hum. Biol.* *77*, 61–70. 10.1353/hub.2005.0028.
42. Secher, B., Fregel, R., Larruga, J.M., Cabrera, V.M., Endicott, P., Pestano, J.J., and González, A.M. (2014). The history of the North African mitochondrial DNA haplogroup U6 gene flow into the African, Eurasian and American continents. *BMC Evol. Biol.* *14*, 109. 10.1186/1471-2148-14-109.
43. Haber, M., Youhanna, S.C., Balanovsky, O., Saade, S., Martínez-Cruz, B., Ghassibe-Sabbagh, M., Shasha, N., Osman, R., el Bayeh, H., Koshel, S., et al. (2012). mtDNA lineages reveal coronary artery disease-associated structures in the Lebanese population. *Ann. Hum. Genet.* *76*, 1–8. 10.1111/j.1469-1809.2011.00682.x.
44. Fadhlaoui-Zid, K., Plaza, S., Calafell, F., Ben Amor, M., Comas, D., and Bennamar El gaied, A. (2004). Mitochondrial DNA heterogeneity in Tunisian Berbers. *Ann. Hum. Genet.* *68*, 222–233. 10.1046/j.1529-8817.2004.00096.x.
45. Krings, M., Salem, A.-E.H., Bauer, K., Geisert, H., Malek, A.K., Chaix, L., Simon, C., Welsby, D., Di Rienzo, A., Utermann, G., et al. (1999). mtDNA Analysis of Nile River Valley Populations: A Genetic Corridor or a Barrier to Migration? *The American Journal of Human Genetics* *64*, 1166–1176. 10.1086/302314.

#### Published partial sequences have been obtained from the following studies:

- Fregel, R., Pestano, J., Arnay, M., Cabrera, V.M., Larruga, J.M., and González, A.M. (2009). The maternal aborigine colonization of La Palma (Canary Islands). *Eur. J. Hum. Genet.* *17*, 1314–1324. 10.1038/ejhg.2009.46.
- Fregel, R., Cabrera, V.M., Larruga, J.M., Hernández, J.C., Gámez, A., Pestano, J.J., Arnay, M., and González, A.M. (2015). Isolation and prominent aboriginal maternal legacy in the present-day population of La Gomera (Canary Islands). *Eur. J. Hum. Genet.* *23*, 1236–1243. 10.1038/ejhg.2014.251.
- Fregel, R., Ordóñez, A.C., Santana-Cabrera, J., Cabrera, V.M., Velasco-Vazquez, J., Alberto, V., Moreno-Benítez, M.A., Delgado-Darias, T., Rodríguez-Rodríguez, A., Hernández, J.C., et al. (2019). Mitogenomes illuminate the origin and migration patterns of the indigenous people of the Canary Islands. *PLoS One* *14*, e0209125. 10.1371/journal.pone.0209125.
- González, A.M., Maceira, B.M., Pérez, E., Cabrera, V.M., López, A.J., and Larruga, J.M. (2012). Genetics, environment, and diabetes-related end-stage renal disease in the Canary Islands. *Genet. Test. Mol. Biomarkers* *16*, 859–864.
- Maca-Meyer, N. (2002). Composición genética de poblaciones históricas y prehistóricas humanas de las Islas Canarias.
- Maca-Meyer, N., González, A.M., Pestano, J., Flores, C., Larruga, J.M., and Cabrera, V.M. (2003). Mitochondrial DNA transit between West Asia and North Africa inferred from U6 phylogeography. *BMC Genet.* *4*, 15.
- Maca-Meyer, N., Arnay, M., Rando, J.C., Flores, C., González, A.M., Cabrera, V.M., and Larruga, J.M. (2004). Ancient mtDNA analysis and the origin of the Guanches. *Eur. J. Hum. Genet.* *12*, 155–162. 10.1038/sj.ejhg.5201075.
- Maca-Meyer, N., Cabrera, V.M., Arnay, M., Flores, C., Fregel, R., González, A.M., and Larruga, J.M. (2005). Mitochondrial DNA diversity in 17th-18th century remains from Tenerife (Canary Islands). *Am. J. Phys. Anthropol.* *127*, 418–426. 10.1002/ajpa.20148.
- Pinto, F.M., González, A.M., Hernández, M., Larruga, J.M., and Cabrera, V.M. (1996). Genetic relationship between the Canary Islanders and their African and Spanish ancestors inferred from mitochondrial DNA sequences. *Ann. Hum. Genet.* *60*, 321–330. 10.1111/j.1469-1809.1996.tb01195.x.
- Rando, J.C., Cabrera, V.M., Larruga, J.M., Hernandez, M., and Gonzalez, A.M. (1999). Phylogeographic patterns of mtDNA reflecting the colonization of the Canary Islands. *Ann. Hum. Genet.* *63*, 413–428. 10.1046/j.1469-1809.1999.6350413.x.
- Rodríguez-Varela, R. et al. Genomic Analyses of Pre-European Conquest Human Remains from the Canary Islands Reveal Close Affinity to Modern North Africans. *Curr. Biol.* *27*, 3396–3402.e5 (2017).
- Santana-Cabrera, J., Fregel, R., Lightfoot, E., Morales, J., Alamón, M., Guillén, J., Moreno, M., and Rodríguez, A. (2016). The early colonial atlantic world: New insights on the African Diaspora from isotopic and ancient DNA analyses of a multiethnic 15th-17th century burial population from the Canary Islands, Spain. *Am. J. Phys. Anthropol.* *159*, 300–312. 10.1002/ajpa.22879.
- Santos, C., Fregel, R., Cabrera, V.M., González, A.M., Larruga, J.M., and Lima, M. (2010). Mitochondrial DNA patterns in the Macaronesia islands: Variation within and among archipelagos. *Am. J. Phys. Anthropol.* *141*, 610–619. 10.1002/ajpa.21180.
- Secher, B., Fregel, R., Larruga, J.M., Cabrera, V.M., Endicott, P., Pestano, J.J., and González, A.M. (2014). The history of the North African mitochondrial DNA haplogroup U6 gene flow into the African, Eurasian and American continents. *BMC Evol. Biol.* *14*, 109. 10.1186/1471-2148-14-109.

**Table S2.** List of complete mtDNA sequences used to analyse the genetic affinities between the Canary Islands and other regions. Related to the main text and methods.

| Accession number | Geographic region | Haplogroup | References          |
|------------------|-------------------|------------|---------------------|
| MH981872         | Paraguay          | A2ar1      | 1                   |
| MH981899         | Paraguay          | A2ar1      | 1                   |
| MG571124         | Peru              | A2ar2      | 2                   |
| MG571132         | Peru              | A2ar2      | 2                   |
| KM656458         | Venezuela         | A2ar3      | 3                   |
| KM656457         | Venezuela         | A2ar3      | 3                   |
| KM102051         | Hispanic          | A2as1      | 4                   |
| KM102106         | Hispanic          | A2as1      | 4                   |
| MK139633         | Canary Islands    | A2as1      | 5                   |
| KY992164         | Granada           | H          | 6                   |
| JQ324671         | Basque Country    | H          | 7                   |
| KU867613         | Galicia           | H          | 8                   |
| KF162582         | Denmark           | H          | 9                   |
| MK059723         | England           | H          | 10                  |
| MG182024         | Morocco           | H1         | 11                  |
| JX082003         | Zaragoza          | H1         | 12                  |
| KY409866         | Italy             | H1         | 13                  |
| LS997822         | Hungary           | H1         | 14                  |
| JQ702226         | Spain             | H1a        | 7                   |
| JQ704106         | Europe            | H1a3       | 7                   |
| MN046452         | Basque Country    | H1b        | 15                  |
| JN581639         | Italy             | H1b        | 16                  |
| EF177411         | Portugal          | H1c3       | 17                  |
| MH120838         | Poland            | H1c4       | 18                  |
| KY410223         | Italy             | H1e1       | 13                  |
| EF177428         | Portugal          | H1e1a      | 17                  |
| KM252751         | Italy             | H1e1a      | 19                  |
| HG00110          | England           | H1e1a      | 1000 Genome Project |
| MZ920506         | Andalusia         | H1e1a      | 20                  |
| JQ324885         | Basque Country    | H1e1a      | 7                   |
| MT179360         | France            | H1h1       | FTDNA               |
| KF161662         | Denmark           | H1j        | 9                   |
| MN687180         | Italy             | H1n6       | 21                  |
| HQ662225         | England           | H1q        | FTDNA               |
| KM252741         | Italy             | H1q2       | 19                  |
| JX154028         | Denmark           | H1t        | 22                  |
| KY656560         | Portugal          | H1u        | FTDNA               |
| FJ460532         | Tunisia           | H1v        | 23                  |
| MW700271         | Spain             | H1ao1      | FTDNA               |
| GQ334714         | Portugal          | H1ao1      | FTDNA               |
| MN540514         | Finland           | H1ap1      | 24                  |
| KF161097         | Denmark           | H1ap1      | 9                   |
| JX082003         | Zaragoza          | H1au       | 12                  |
| HQ841014         | England           | H1bb       | FTDNA               |
| JQ704606         | Germany           | H1br       | 7                   |
| HQ384179         | Galicia           | H1bv1      | 8                   |
| KC257391         | Europe            | H1cf       | 25                  |
| FJ719303         | Algeria           | H1cf       | 26                  |
| LS997685         | Hungary           | H2a1       | 14                  |
| KY670885         | Russia            | H2a1       | 27                  |
| JQ324555         | Basque Country    | H2a5a      | 7                   |
| JQ703382         | England           | H3b1b1     | 7                   |
| KF162077         | Denmark           | H3c        | 9                   |
| MF085405         | Sweden            | H3c        | FTDNA               |
| JX153807         | Denmark           | H3c        | 22                  |
| KY992146         | Andalusia         | H3c2       | 6                   |
| KY992145         | Andalusia         | H3c2       | 6                   |
| JQ705425         | Europe            | H3c2       | 7                   |
| KU867596         | Galicia           | H3g        | 8                   |
| MF177164         | Poland            | H3k        | 28                  |
| JN112339         | Finland           | H3r        | FTDNA               |
| MG201867         | Wales             | H3v        | FTDNA               |
| FJ460550         | Tunisia           | H3w        | 23                  |
| MK114114         | England           | H3an       | FTDNA               |
| KM102136         | Hispanic          | H3ap       | 4                   |
| MW389259         | Italy             | H4a1       | 29                  |
| MZ920434         | Galicia           | H4a1       | 20                  |
| EF556191         | Tunisia           | H4a1a3a    | 30                  |
| KF305642         | Bulgaria          | H4a1c2     | FTDNA               |
| MZ920465         | Andalusia         | H4a1       | 20                  |
| GQ983091         | Italy             | H5         | 31                  |
| KT897693         | Portugal          | H5a2       | FTDNA               |
| HQ384190         | Galicia           | H5a1j      | 8                   |
| JQ324706         | Basque Country    | H5a3a1     | 7                   |
| MN046514         | Basque Country    | H5a3a1     | 15                  |
| MN046555         | Basque Country    | H5a3a1     | 15                  |
| KY408148         | Italy             | H5b        | 13                  |
| MG773619         | Italy             | H6a1a      | 32                  |
| JQ324728         | Basque Country    | H61a7      | 7                   |
| KF161744         | Denmark           | H6a1b2     | 9                   |
| JQ703732         | Ireland           | H6a1b2     | 7                   |
| AY495120         | France            | H7         | 33                  |
| Berber360        | Morocco           | H7         | 34                  |
| MH043574         | Ibiza             | H7         | 35                  |
| KP900762         | Portugal          | H7         | 36                  |
| JQ704185         | France            | H11a       | 7                   |
| HM103355         | Zaragoza          | H13a1b     | 37                  |
| JQ704795         | Basque Country    | H14b2a     | 7                   |
| KJ169903         | Granada           | H20a1a     | 6                   |
| MN046542         | Basque Country    | H24        | 15                  |
| JQ324625         | Basque Country    | H27        | 7                   |
| JX152998         | Italy             | H30a       | 22                  |
| AY495114         | Europe            | H43        | 33                  |
| KU683584         | Uyghur            | H53        | 38                  |
| KY409190         | Italy             | H71        | 13                  |
| KY409743         | Italy             | HV0        | 13                  |
| JF749647         | Morocco           | HV0        | 39                  |

|          |                    |                |                     |
|----------|--------------------|----------------|---------------------|
| JX153420 | Denmark            | HV0g           | 22                  |
| HQ384193 | Galicia            | HV16311        | 8                   |
| MH981877 | Paraguay           | HV16311        | 1                   |
| KP340129 | Italy              | HV16311        | 40                  |
| MK040560 | Finland            | HV9            | FTDNA               |
| KF162880 | Denmark            | I              | 9                   |
| KX273860 | Germany            | I              | FTDNA               |
| FJ460562 | Tunisia            | I1a1           | 23                  |
| EF177414 | Portugal           | I1a1           | 17                  |
| KJ882427 | France             | I2c            | FTDNA               |
| KY369150 | Italy              | I3a            | FTDNA               |
| KU867600 | Galicia            | J1b1a1f        | 6                   |
| MF362837 | Armenia            | J1b1b1d        | 41                  |
| JQ797765 | Kuwait             | J1b1b1d        | 42                  |
| MH298071 | Romania            | J1c15          | 43                  |
| MT079096 | Switzerland        | J1c1b          | 44                  |
| KX440218 | Italy              | J1c2           | 17                  |
| MG646278 | Poland             | J1c2           | 18                  |
| KY930954 | Netherlands        | J1c2a3         | FTDNA               |
| MF114222 | Poland             | J1c2a1         | 45                  |
| EF177422 | Portugal           | J1c2c1         | 17                  |
| KJ486154 | England            | J12c3          | FTDNA               |
| MZ920408 | Castilla           | J1c2e2         | 20                  |
| MZ920344 | Castilla           | J1c2h          | 20                  |
| JQ705996 | Europe             | J1c2h          | 7                   |
| KY399151 | Italy              | J1c3           | 13                  |
| JX153698 | Denmark            | J1c3           | 22                  |
| JN635300 | Galicia            | J1c5a          | 37                  |
| HQ876599 | Galicia            | J1c7           | FTDNA               |
| KX440242 | Portugal           | J1c7           | 17                  |
| MK321344 | Galicia            | J2a1a1         | 46                  |
| HG01052  | Puerto Rico        | J2a1a1         | 1000 Genome Project |
| JX297144 | Basque Country     | J2a1a1e        | 47                  |
| FJ460543 | Tunisia            | J2a2b1         | 23                  |
| JQ797925 | Morocco            | J2a2b1         | 42                  |
| JQ797926 | Morocco            | J2a2b1a        | 42                  |
| KX440260 | Tunisia            | J2a2b1a        | 17                  |
| JQ797935 | Algeria            | J2a2d          | 42                  |
| KX440266 | Portugal           | J2a2d          | 17                  |
| FJ460559 | Tunisia            | J2a2d1         | 23                  |
| KX440262 | Tunisia            | J2a2d1         | 17                  |
| KX440263 | Tunisia            | J2a2d1         | 17                  |
| KX440264 | Algeria            | J2a2d1         | 17                  |
| KT700200 | Portugal           | J2a2d1a        | FTDNA               |
| JF938916 | Portugal           | J2b1a2a        | FTDNA               |
| MT588261 | Poland             | K1a            | 48                  |
| MZ920324 | Castilla           | K1a            | 20                  |
| KF162721 | Denmark            | K1a            | 9                   |
| KF162750 | Denmark            | K1a            | 9                   |
| MF991436 | Morocco            | K1a1b1         | 34                  |
| GU471243 | Portugal           | K1a14          | FTDNA               |
| MK059746 | England            | K1a1b1c        | 10                  |
| KT749779 | Italy              | K1a4a1         | 49                  |
| JQ705785 | Tunisia            | K1a4a1         | 7                   |
| KJ187873 | Tunisia            | K1a4a1         | 50                  |
| MT079061 | Switzerland        | K1a4a1         | 44                  |
| MZ920320 | Castilla           | K1a4a2a        | 20                  |
| EF177416 | Portugal           | K1a4f1         | 51                  |
| KF161232 | Denmark            | K1b1a1c        | 9                   |
| EF177415 | Portugal           | K1b1a2         | 51                  |
| KU867603 | Galicia            | K2b1a1a        | 8                   |
| JN107640 | England            | K2b1a1a        | FTDNA               |
| JQ044893 | Mali               | L0a1a1         | 52                  |
| JQ044943 | Burkina Faso       | L0a1a3         | 52                  |
| DQ112692 | Dominican Republic | L1b1a          | 53                  |
| HG02589  | Gambia             | L1b1a          | 1000 Genome Project |
| JQ044889 | Mali               | L1b1a          | 52                  |
| JN214474 | Spain              | L1b1a2a        | 54                  |
| JN214445 | Galicia            | L1b1a2a        | 54                  |
| KT819246 | Morocco            | L1b1a6         | 6                   |
| JQ705832 | West Africa        | L1b1a10        | 7                   |
| EF657334 | West Africa        | L1b1a10        | 55                  |
| EU935458 | Egypt              | L1c3a1a        | 56                  |
| JF509360 | West Sahara        | L1c3b1         | FTDNA               |
| KT819238 | Morocco            | L2a1           | 57                  |
| KT886411 | Sweden             | L2a1           | FTDNA               |
| KT819207 | Andalusia          | L2a1           | 57                  |
| DQ304961 | African American   | L2a1f1         | 4                   |
| KJ446763 | Nigeria            | L2a1a2b        | 38                  |
| DQ304961 | African American   | L2a1a3b        | 4                   |
| DQ112723 | Burkina Faso       | L2a1c          | 53                  |
| JN214440 | Galicia            | L2a1c3a        | 54                  |
| JN214432 | Andalusia          | L2a1c4         | 54                  |
| DQ112709 | Dominican Republic | L2e            | 53                  |
| MH980013 | Dominican Republic | L3b1a          | FTDNA               |
| KT819259 | Morocco            | L3b1a5         | 57                  |
| DQ112710 | Dominican Republic | L3b2a          | 53                  |
| KJ185799 | Angola             | L3f1b1a        | 58                  |
| KJ959230 | Galicia            | L3f1b6         | 59                  |
| KM101717 | African American   | L3d1'2'3'4'5'6 | 4                   |
| HG02768  | Gambia             | L3d1b1         | 1000 Genome Project |
| KT819225 | Andalusia          | L3d1b1         | 57                  |
| JX303821 | Zambia             | L3d1b3a        | 60                  |
| EU092827 | West Africa        | L3e1           | 61                  |
| KF055308 | African American   | L3e1e          | 62                  |
| KJ185846 | Angola             | L3e3a          | 58                  |
| HG02464  | Gambia             | L3e4a          | 1000 Genome Project |
| HG03081  | Sierra Leona       | L3e4a          | 1000 Genome Project |
| DQ112722 | Dominican Republic | L3e4a          | 53                  |
| HQ675033 | Galicia            | L3x2b          | 63                  |
| KC152546 | Tunisia            | M1b1a          | 64                  |
| EF177409 | Portugal           | T1a            | 17                  |
| KX440297 | Tunisia            | T1a            | 17                  |
| AF382006 | Galicia            | T1a1           | 65                  |
| MN046585 | Basque Country     | T1a1           | 15                  |
| MN977125 | France             | T1a1           | YSEQ                |
| EF177441 | Portugal           | T1a2a          | 51                  |
| KX440305 | Morocco            | T1a6           | 17                  |
| KX440306 | Tunisia            | T1a6           | 17                  |
| KX440321 | Portugal           | T2a1b1a2       | 17                  |



|            |                |         |         |
|------------|----------------|---------|---------|
| EU747356   | Germany        | T2b     | FTDNA   |
| MK059730   | England        | T2b     | 10      |
| JX153739   | Denmark        | T2b     | 22      |
| MF991443   | Andalusia      | T2b3    | 34      |
| MF991444   | Andalusia      | T2b3    | 34      |
| MF991439   | Morocco        | T2b3    | 34      |
| KX440330   | Tunisia        | T2b3    | 17      |
| KX440333   | Portugal       | T2b3    | 17      |
| JQ798070   | West Europe    | T2b4    | 42      |
| JF968593   | Belarus        | T2b11   | FTDNA   |
| KF161296   | Denmark        | T2c1    | 9       |
| MH918096   | Sweden         | T2c1    | FTDNA   |
| MH687980   | Portugal       | T2c1a2  | FTDNA   |
| KX440361   | Tunisia        | T2c1d2  | 17      |
| MF991441   | Andalusia      | T2c1d   | 34      |
| KF162009   | Denmark        | T2c1d   | 9       |
| MZ920493   | Galicia        | T2c1d   | 20      |
| JQ798093   | Kuwait         | T2c1d1c | 42      |
| KX440359   | Morocco        | T2c1d1c | 17      |
| MK139648   | Morocco        | T2c1d1c | 5       |
| MN046533   | Basque Country | T2e1    | 15      |
| HQ286590   | Armenia        | T2f2    | FTDNA   |
| EF177434   | Portugal       | U2e1a1  | 17      |
| KF162886   | Denmark        | U2e1b1  | 9       |
| huDOCFDA   | Italy          | U2e2a1a | 23andMe |
| MK321335   | Portugal       | U3a1    | 46      |
| MZ920578   | Galicia        | U4a1a   | 20      |
| KY411447   | Italy          | U4a2a   | 66      |
| JQ705130   | Portugal       | U4b3    | 7       |
| JX153455   | Italy          | U4c1    | 22      |
| MG766943   | Scotland       | U4c1    | FTDNA   |
| MK059489   | Denmark        | U4c1    | 10      |
| JQ704661   | Scotland       | U4c1    | 7       |
| DerekMck   | Scotland       | U4c1    | 23andMe |
| JQ701869   | England        | U5a1a1m | 7       |
| KF163031   | Denmark        | U5a1b4  | 9       |
| HM173090   | Ireland        | U5a1d2a | FTDNA   |
| EF177408   | Portugal       | U5a2a1  | 46      |
| KM047194   | Italy          | U5a2b   | 28      |
| JN897374   | Algeria        | U5b1b1  | FTDNA   |
| JQ701803   | Scandinavia    | U5b1b1  | 7       |
| KT372902   | England        | U5b1e   | FTDNA   |
| HQ675036   | Galicia        | U5b1f1  | 63      |
| HQ384207   | Galicia        | U5b1g   | 8       |
| KC763416   | Finland        | U5b2a   | 67      |
| DQ156210   | Zaragoza       | U5b2a1a | 68      |
| MF498659   | West Europe    | U5b2b3a | 69      |
| JX120710   | Galicia        | U6a1a1  | 70g     |
| KT819213   | Andalusia      | U6a1a1  | 57      |
| MZ920339   | Andalusia      | U6a1a1  | 20      |
| MZ920421   | Andalusia      | U6a1a1  | 20      |
| KF451721   | Algeria        | U6a1a1  | 71      |
| JX120772   | Finland        | U6a3a1  | 70      |
| KT819216   | Andalusia      | U6a3b   | 57      |
| KT799679   | Andalusia      | U6a5    | FTDNA   |
| KC152550   | Tunisia        | U6a6b1  | 64      |
| JX120724   | Morocco        | U6a6b1  | 70      |
| KT819265   | Morocco        | U6a7a1  | 57      |
| AY275531   | Mauritania     | U6a7a1  | 72      |
| JX120731   | Algeria        | U6a7b1  | 70      |
| EF064339   | France         | U6a7b1  | 73      |
| MZ920499   | Andalusia      | U6b1a   | 20      |
| KT779184   | Lebanon        | U6b1a   | 35      |
| AY882417   | Spain          | U6b1a   | 74      |
| JX120733   | Basque Country | U6b1a1  | 70      |
| EF064340   | Spain          | U6b1a1  | 73      |
| JX120735   | Morocco        | U6b3a   | 70      |
| FJ460538   | Tunisia        | U6b3a   | 23      |
| KC152543   | Morocco        | U6b3a   | 64      |
| KC152561   | Morocco        | U6c1    | 64      |
| JX120744   | Andalusia      | U6c1    | 70      |
| EF064344   | Italy          | U6c1    | 73      |
| JX120770   | Italy          | U6c1    | 70      |
| AY495327   | Europe         | V       | 33      |
| HQ675042   | Galicia        | V       | 63      |
| Nedzad2342 | Bosnia         | V2      | 23andMe |
| JQ702667   | Ireland        | V3a1    | 7       |
| EF177445   | Portugal       | V9      | 17      |
| KF161476   | Denmark        | V17     | 9       |
| JQ705168   | Europe         | V20     | 7       |
| KC286612   | Austria        | W1e1    | 75      |
| GU646872   | Ireland        | W5a1a   | FTDNA   |
| MN699891   | Poland         | W6a     | 76      |
| JX021501   | Britain        | X2b     | FTDNA   |
| JQ704969   | Britain        | X2b     | 7       |
| MZ920343   | Andalusia      | X2d2    | 20      |
| HQ384215   | Galicia        | X2c1j   | 8       |
| MN046532   | Basque Country | X2c1j   | 15      |
| JQ245804   | Tunisia        | X3a     | 77      |

## References

1. Simão, F., Strobl, C., Vullo, C., Catelli, L., Machado, P., Huber, N., Schnaller, L., Huber, G., Xavier, C., Carvalho, E.F., et al. (2019). The maternal inheritance of Alto Paraná revealed by full mitogenome sequences. *Forensic Sci. Int. Genet.* *39*, 66–72. [10.1016/j.fsigen.2018.12.007](https://doi.org/10.1016/j.fsigen.2018.12.007).
2. Barbieri, C., Sandoval, J.R., Valqui, J., Shimelman, A., Ziemendorff, S., Schröder, R., Geppert, M., Roewer, L., Gray, R., Stoneking, M., et al. (2017). Enclaves of genetic diversity resisted Inca impacts on population history. *Sci. Rep.* *7*, 17411. [10.1038/s41598-017-17728-w](https://doi.org/10.1038/s41598-017-17728-w).
3. Lee, E.J., and Merriwether, D.A. (2015). Identification of Whole Mitochondrial Genomes from Venezuela and Implications on Regional Phylogenies in South America. *Hum. Biol.* *87*, 29–38. [10.13110/humanbiology.87.1.0029](https://doi.org/10.13110/humanbiology.87.1.0029).
4. Just, R.S., Scheible, M.K., Fast, S.A., Sturk-Andreaggi, K., Röck, A.W., Bush, J.M., Higginbotham, J.L., Peck, M.A., Ring, J.D., Huber, G.E., et al. (2015). Full mtGenome reference data: development and characterization of 588 forensic-quality haplotypes representing three U.S. populations. *Forensic Sci. Int. Genet.* *14*, 141–155. [10.1016/j.fsigen.2014.09.021](https://doi.org/10.1016/j.fsigen.2014.09.021).
5. Fregel, R., Ordóñez, A.C., Santana-Cabrera, J., Cabrera, V.M., Velasco-Vazquez, J., Alberto, V., Moreno-Benítez, M.A., Delgado-Darias, T., Rodríguez-Rodríguez, A., Hernández, J.C., et al. (2019). Mitogenomes illuminate the origin and migration patterns of the indigenous people of the Canary Islands. *PLoS One* *14*, e0209125. [10.1371/journal.pone.0209125](https://doi.org/10.1371/journal.pone.0209125).
6. Hernández, C.L., Dugoujon, J.M., Novelletto, A., Rodríguez, J.N., Cuesta, P., and Calderón, R. (2017). The distribution of mitochondrial DNA haplogroup H in southern Iberia indicates ancient human genetic exchanges along the western edge of the Mediterranean. *BMC Genet.* *18*, 46. [10.1186/s12863-017-0514-6](https://doi.org/10.1186/s12863-017-0514-6).
7. Behar, D.M., van Oven, M., Rosset, S., Metspalu, M., Loogväli, E.-L., Silva, N.M., Kivisild, T., Torroni, A., and Villems, R. (2012). A “Copernican” reassessment of the human mitochondrial DNA tree from its root. *Am. J. Hum. Genet.* *90*, 675–684. [10.1016/j.ajhg.2012.03.002](https://doi.org/10.1016/j.ajhg.2012.03.002).
8. Gómez-Carballa, A., Cerezo, M., Balboa, E., Heredia, C., Castro-Feijóo, L., Rica, I., Barreiro, J., Eiris, J., Cabanas, P., Martínez-Soto, I., et al. (2011). Evolutionary analyses of entire genomes do not support the association of mtDNA mutations with Ras/MAPK pathway syndromes. *PLoS One* *6*, e18348. [10.1371/journal.pone.0018348](https://doi.org/10.1371/journal.pone.0018348).
9. Li, S., Besenbacher, S., Li, Y., Kristiansen, K., Grarup, N., Albrechtsen, A., Sparsø, T., Korneliusen, T., Hansen, T., Wang, J., et al. (2014). Variation and association to diabetes in 2000 full mtDNA sequences mined from an exome study in a Danish population. *Eur. J. Hum. Genet.* *22*, 1040–1045. [10.1038/ejhg.2013.282](https://doi.org/10.1038/ejhg.2013.282).
10. Klunk, J., Duggan, A.T., Redfern, R., Gamble, J., Boldsen, J.L., Golding, G.B., Walter, B.S., Eaton, K., Stangroom, J., Rouillard, J.-M., et al. (2019). Genetic resiliency and the Black Death: No apparent loss of mitogenomic diversity due to the Black Death in medieval London and Denmark. *Am. J. Phys. Anthropol.* *169*, 240–252. [10.1002/ajpa.23820](https://doi.org/10.1002/ajpa.23820).
11. Font-Porterías, N., Solé-Morata, N., Serra-Vidal, G., Bekada, A., Fadhlouzi-Zid, K., Zalloua, P., Calafell, F., and Comas, D. (2018). The genetic landscape of Mediterranean North African populations through complete mtDNA sequences. *Ann. Hum. Biol.* *45*, 98–104. [10.1080/03014460.2017.1413133](https://doi.org/10.1080/03014460.2017.1413133).
12. Pacheu-Grau, D., Gómez-Durán, A., Iglesias, E., López-Gallardo, E., Montoya, J., and Ruiz-Pesini, E. (2013). Mitochondrial antibiograms in personalized medicine. *Hum. Mol. Genet.* *22*, 1132–1139. [10.1093/hmg/dd517](https://doi.org/10.1093/hmg/dd517).
13. Olivieri, A., Sidore, C., Achilli, A., Angius, A., Posth, C., Furtwängler, A., Brandini, S., Capodiferro, M.R., Gandini, F., Zoledziewska, M., et al. (2017). Mitogenome Diversity in Sardinians: A Genetic Window onto an Island’s Past. *Molecular Biology and Evolution* *34*, 1230–1239. [10.1093/molbev/msx082](https://doi.org/10.1093/molbev/msx082).
14. Maróti, Z., Török, T., Neparáczi, E., Raskó, I., Nagy, I., Maróti, M., Varga, T., Bihari, P., Boldogkői, Z., Tombácz, D., et al. (2018). MITOMIX, an Algorithm to Reconstruct Population Admixture Histories Indicates Ancient European Ancestry of Modern Hungarians. *bioRxiv*, 247395. [10.1101/247395](https://doi.org/10.1101/247395).
15. García, Ó., Alonso, S., Huber, N., Bodner, M., and Parson, W. (2020). Forensically relevant phylogeographic evaluation of mitogenome variation in the Basque Country. *Forensic Sci. Int. Genet.* *46*, 102260. [10.1016/j.fsigen.2020.102260](https://doi.org/10.1016/j.fsigen.2020.102260).
16. Bertolin, C., Magri, C., Barlati, S., Vettori, A., Perini, G.I., Peruzzi, P., Mostacciolo, M.L., and Vazza, G. (2011). Analysis of complete mitochondrial genomes of patients with schizophrenia and bipolar disorder. *J. Hum. Genet.* *56*, 869–872. [10.1038/jhg.2011.111](https://doi.org/10.1038/jhg.2011.111).
17. Pereira, L., Gonçalves, J., Franco-Duarte, R., Silva, J., Rocha, T., Arnold, C., Richards, M., and Macaulay, V. (2007). No Evidence for an mtDNA Role in Sperm Motility: Data from Complete Sequencing of Asthenozoospermic Males. *Molecular Biology and Evolution* *24*, 868–874. [10.1093/molbev/msm004](https://doi.org/10.1093/molbev/msm004).
18. Piotrowska-Nowak, A., Elson, J.L., Sobczyk-Kopciol, A., Piwonska, A., Puch-Walczak, A., Drygas, W., Ploski, R., Bartnik, E., and Tonska, K. (2018). New mtDNA Association Model, MutPred Variant Load, Suggests Individuals With Multiple Mildly Deleterious mtDNA Variants Are More Likely to Suffer From Atherosclerosis. *Front. Genet.* *9*, 702. [10.3389/fgene.2018.00702](https://doi.org/10.3389/fgene.2018.00702).
19. Bodner, M., Iuvare, A., Strobl, C., Nagl, S., Huber, G., Pelotti, S., Pettener, D., Luiselli, D., and Parson, W. (2015). Helena, the hidden beauty: Resolving the most common West Eurasian mtDNA control region haplotype by massively parallel sequencing an Italian population sample. *Forensic Sci. Int. Genet.* *15*, 21–26. [10.1016/j.fsigen.2014.09.012](https://doi.org/10.1016/j.fsigen.2014.09.012).
20. Silva, M., Oteo-García, G., Martiniano, R., Guimarães, J., von Tersch, M., Madour, A., Shoeib, T., Fichera, A., Justeau, P., Foody, M.G.B., et al. (2021). Biomolecular insights into North African-related ancestry, mobility and diet in eleventh-century Al-Andalus. *Sci. Rep.* *11*, 1–13. [10.1038/s41598-021-95996-3](https://doi.org/10.1038/s41598-021-95996-3).

21. Modi, A., Lancioni, H., Cardinali, I., Capodiferro, M.R., Migliore, N.R., Hussein, A., Strobl, C., Bodner, M., Schnaller, L., Xavier, C., et al. (2020). The mitogenome portrait of Umbria in Central Italy as depicted by contemporary inhabitants and pre-Roman remains. *Scientific Reports* 10. 10.1038/s41598-020-67445-0.
22. Raule, N., Sevini, F., Li, S., Barbieri, A., Tallaro, F., Lomartire, L., Vianello, D., Montesanto, A., Moilanen, J.S., Bezrukov, V., et al. (2014). The co-occurrence of mtDNA mutations on different oxidative phosphorylation subunits, not detected by haplogroup analysis, affects human longevity and is population specific. *Aging Cell* 13, 401–407. 10.1111/ace1.12186.
23. Costa, M.D., Cherni, L., Fernandes, V., Freitas, F., Ammar el Gaaied, A.B., and Pereira, L. (2009). Data from complete mtDNA sequencing of Tunisian centenarians: Testing haplogroup association and the “golden mean” to longevity. *Mech. Ageing Dev.* 130, 222–226. 10.1016/j.mad.2008.12.001.
24. Översti, S., Majander, K., Salmela, E., Salo, K., Arppe, L., Belskiy, S., Etu-Sihvola, H., Laakso, V., Mikkola, E., Pfrengle, S., et al. (2019). Human mitochondrial DNA lineages in Iron-Age Fennoscandia suggest incipient admixture and eastern introduction of farming-related maternal ancestry. *Sci. Rep.* 9, 1–14. 10.1038/s41598-019-51045-8.
25. Sequeira, A., Rollins, B., Magnan, C., van Oven, M., Baldi, P., Myers, R.M., Barchas, J.D., Schatzberg, A.F., Watson, S.J., Akil, H., et al. (2015). Mitochondrial mutations in subjects with psychiatric disorders. *PLoS One* 10, e0127280. 10.1371/journal.pone.0127280.
26. Fregel, R., Pestano, J., Arnay, M., Cabrera, V.M., Larruga, J.M., and González, A.M. (2009). The maternal aborigine colonization of La Palma (Canary Islands). *Eur. J. Hum. Genet.* 17, 1314–1324. 10.1038/ejhg.2009.46.
27. Malyarchuk, B., Litvinov, A., Derenko, M., Skonieczna, K., Grzybowski, T., Grosheva, A., Shneider, Y., Rychkov, S., and Zhukova, O. (2017). Mitogenomic diversity in Russians and Poles. *Forensic Sci. Int. Genet.* 30, 51–56. 10.1016/j.fsigen.2017.06.003.
28. Skonieczna, K., Malyarchuk, B., Jawieñ, A., Marszałek, A., Banaszkiewicz, Z., Jarmocik, P., and Grzybowski, T. (2018). Mitogenomic differences between the normal and tumor cells of colorectal cancer patients. *Hum. Mutat.* 39, 691–701. 10.1002/humu.23402.
29. Diroma, M.A., Modi, A., Lari, M., Sineo, L., Caramelli, D., and Vai, S. (2021). New Insights Into Mitochondrial DNA Reconstruction and Variant Detection in Ancient Samples. *Front. Genet.* 12, 619950. 10.3389/fgene.2021.619950.
30. Behar, D.M., Metspalu, E., Kivisild, T., Rosset, S., Tzur, S., Hadid, Y., Yudkovsky, G., Rosengarten, D., Pereira, L., Amorim, A., et al. (2008). Counting the founders: the matrilineal genetic ancestry of the Jewish Diaspora. *PLoS One* 3, e2062. 10.1371/journal.pone.002062.
31. Santoro, A., Balbi, V., Balducci, E., Pirazzini, C., Rosini, F., Tavano, F., Achilli, A., Siviero, P., Minicuci, N., Bellavista, E., et al. (2010). Evidence for sub-haplogroup h5 of mitochondrial DNA as a risk factor for late onset Alzheimer’s disease. *PLoS One* 5, e12037. 10.1371/journal.pone.0012037.
32. Emery, M.V., Duggan, A.T., Murchie, T.J., Stark, R.J., Klunk, J., Hider, J., Eaton, K., Karpinski, E., Schwarcz, H.P., Poinar, H.N., et al. (2018). Ancient Roman mitochondrial genomes and isotopes reveal relationships and geographic origins at the local and pan-Mediterranean scales. *Journal of Archaeological Science: Reports* 20, 200–209. 10.1016/j.jasrep.2018.04.036.
33. Coble, M.D., Just, R.S., O’Callaghan, J.E., Letmanyi, I.H., Peterson, C.T., Irwin, J.A., and Parsons, T.J. (2004). Single nucleotide polymorphisms over the entire mtDNA genome that increase the power of forensic testing in Caucasians. *Int. J. Legal Med.* 118, 137–146. 10.1007/s00414-004-0427-6.
34. Fregel, R., Méndez, F.L., Bokbot, Y., Martín-Socas, D., Camalich-Massieu, M.D., Santana, J., Morales, J., Ávila-Arcos, M.C., Underhill, P.A., Shapiro, B., et al. (2018). Ancient genomes from North Africa evidence prehistoric migrations to the Maghreb from both the Levant and Europe. *Proc. Natl. Acad. Sci. U. S. A.* 115, 6774–6779. 10.1073/pnas.1800851115.
35. Zalloua, P., Collins, C.J., Gosling, A., Biagini, S.A., Costa, B., Kardailsky, O., Nigro, L., Khalil, W., Calafell, F., and Matisoo-Smith, E. (2018). Ancient DNA of Phoenician remains indicates discontinuity in the settlement history of Ibiza. *Sci. Rep.* 8, 1–15. 10.1038/s41598-018-35667-y.
36. de Araujo, L.F., Fonseca, A.S., Muys, B.R., Plaça, J.R., Bueno, R.B.L., Lorenzi, J.C.C., Santos, A.R.D., Molfetta, G.A., Zanelle, D.L., Souza, J.E.S., et al. (2015). Mitochondrial genome instability in colorectal adenoma and adenocarcinoma. *Tumour Biol.* 36, 8869–8879. 10.1007/s13277-015-3640-7.
37. Gómez-Durán, A., Pacheu-Grau, D., López-Gallardo, E., Díez-Sánchez, C., Montoya, J., López-Pérez, M.J., and Ruiz-Pesini, E. (2010). Unmasking the causes of multifactorial disorders: OXPHOS differences between mitochondrial haplogroups. *Hum. Mol. Genet.* 19, 3343–3353. 10.1093/hmg/ddq246.
38. Zheng, H.-X., Li, L., Jiang, X.-Y., Yan, S., Qin, Z., Wang, X., and Jin, L. (2017). MtDNA genomes reveal a relaxation of selective constraints in low-BMI individuals in a Uyghur population. *Hum. Genet.* 136, 1353–1362. 10.1007/s00439-017-1829-0.
39. Aboukhalid, R., Sturk-Andreaggi, K., Bouabdellah, M., Squalli, D., Irwin, J.A., and Amzazi, S. (2013). Mitochondrial DNA control region variation from samples of the Moroccan population. *Int. J. Legal Med.* 127, 757–759. 10.1007/s00414-012-0813-4.
40. De Fanti, S., Barbieri, C., Sarno, S., Sevini, F., Vianello, D., Tamm, E., Metspalu, E., van Oven, M., Hübner, A., Sazzini, M., et al. (2015). Fine Dissection of Human Mitochondrial DNA Haplogroup HV Lineages Reveals Paleolithic Signatures from European Glacial Refugia. *PLoS One* 10, e0144391. 10.1371/journal.pone.0144391.
41. Margaryan, A., Derenko, M., Hovhannisyán, H., Malyarchuk, B., Heller, R., Khachatryan, Z., Avetisyan, P., Badalyan, R., Bobokhyan, A., Melikyan, V., et al. (2017). Eight Millennia of Matrilineal Genetic Continuity in the South Caucasus. *Curr. Biol.* 27, 2023–2028.e7. 10.1016/j.cub.2017.05.087.

42. Pala, M., Olivieri, A., Achilli, A., Accetturo, M., Metspalu, E., Reidla, M., Tamm, E., Karmin, M., Reisberg, T., Hooshiar Kashani, B., et al. (2012). Mitochondrial DNA signals of late glacial recolonization of Europe from near eastern refugia. *Am. J. Hum. Genet.* *90*, 915–924. 10.1016/j.ajhg.2012.04.003.
43. Rusu, I., Modi, A., Radu, C., Mircea, C., Vulpoi, A., Dobrinescu, C., Bodolică, V., Potârniche, T., Popescu, O., Caramelli, D., et al. (2019). Mitochondrial ancestry of medieval individuals carelessly interred in a multiple burial from southeastern Romania. *Sci. Rep.* *9*, 1–12. 10.1038/s41598-018-37760-8.
44. Furtwängler, A., Röhrlich, A.B., Lamnidis, T.C., Papac, L., Neumann, G.U., Siebke, I., Reiter, E., Steuri, N., Hald, J., Denaire, A., et al. (2020). Ancient genomes reveal social and genetic structure of Late Neolithic Switzerland. *Nat. Commun.* *11*, 1915. 10.1038/s41467-020-15560-x.
45. Tassi, F., Vai, S., Ghirotto, S., Lari, M., Modi, A., Pilli, E., Brunelli, A., Susca, R.R., Budnik, A., Labuda, D., et al. (2017). Genome diversity in the Neolithic Globular Amphorae culture and the spread of Indo-European languages. *Proceedings of the Royal Society B: Biological Sciences* *284*, 20171540. 10.1098/rspb.2017.1540.
46. González-Forbes, G., Tassi, F., Trucchi, E., Henneberger, K., Pajmans, J.L.A., Díez-Del-Molino, D., Schroeder, H., Susca, R.R., Barroso-Ruiz, C., Bermudez, F.J., et al. (2019). A western route of prehistoric human migration from Africa into the Iberian Peninsula. *Proc. Biol. Sci.* *286*, 20182288. 10.1098/rspb.2018.2288.
47. Cardoso, S., Valverde, L., Alfonso-Sánchez, M.A., Palencia-Madrid, L., Elcoroaristizabal, X., Algorta, J., Catarino, S., Arteta, D., Herrera, R.J., Zarrabeitia, M.T., et al. (2013). The Expanded mtDNA Phylogeny of the Franco-Cantabrian Region Upholds the Pre-Neolithic Genetic Substrate of Basques. *PLoS ONE* *8*, e67835. 10.1371/journal.pone.0067835.
48. Juras, A., Ehler, E., Chyleński, M., Pospieszny, Ł., Spinek, A.E., Malmström, H., Krzewińska, M., Szostek, K., Pasterkiewicz, W., Florek, M., et al. (2021). Maternal genetic origin of the late and final Neolithic human populations from present-day Poland. *Am. J. Phys. Anthropol.* *176*, 223–236. 10.1002/ajpa.24372.
49. Coia, V., Cipollini, G., Anagnostou, P., Maixner, F., Battaglia, C., Brisighelli, F., Gómez-Carballa, A., Destro Bisol, G., Salas, A., and Zink, A. (2016). Whole mitochondrial DNA sequencing in Alpine populations and the genetic history of the Neolithic Tyrolean Iceman. *Sci. Rep.* *6*, 18932. 10.1038/srep18932.
50. Hsouna, S., Ben Halim, N., Lasram, K., Meiloud, G., Arfa, I., Kerkeni, E., Romdhane, L., Jamoussi, H., Bahr, S., Ben Ammar, S., et al. (2016). Study of the T16189C variant and mitochondrial lineages in Tunisian and overall Mediterranean region. *Mitochondrial DNA A DNA Mapp Seq Anal* *27*, 1558–1563. 10.3109/19401736.2014.953136.
51. Pereira, J.B., Costa, M.D., Vieira, D., Pala, M., Bamford, L., Harich, N., Cherni, L., Alshamali, F., Hatina, J., Rychkov, S., et al. (2017). Reconciling evidence from ancient and contemporary genomes: a major source for the European Neolithic within Mediterranean Europe. *Proceedings of the Royal Society B: Biological Sciences* *284*, 20161976. 10.1098/rspb.2016.1976.
52. Barbieri, C., Whitten, M., Beyer, K., Schreiber, H., Li, M., and Pakendorf, B. (2012). Contrasting maternal and paternal histories in the linguistic context of Burkina Faso. *Mol. Biol. Evol.* *29*, 1213–1223. 10.1093/molbev/msr291.
53. Kivisild, T., Shen, P., Wall, D.P., Do, B., Sung, R., Davis, K., Passarino, G., Underhill, P.A., Scharfe, C., Torroni, A., et al. (2006). The role of selection in the evolution of human mitochondrial genomes. *Genetics* *172*, 373–387. 10.1534/genetics.105.043901.
54. Cerezo, M., Achilli, A., Olivieri, A., Perego, U.A., Gómez-Carballa, A., Brisighelli, F., Lancioni, H., Woodward, S.R., López-Soto, M., Carracedo, A., et al. (2012). Reconstructing ancient mitochondrial DNA links between Africa and Europe. *Genome Res.* *22*, 821–826. 10.1101/gr.134452.111.
55. Herrnstadt, C., Elson, J.L., Fahy, E., Preston, G., Turnbull, D.M., Anderson, C., Ghosh, S.S., Olefsky, J.M., Beal, M.F., Davis, R.E., et al. (2002). Reduced-median-network analysis of complete mitochondrial DNA coding-region sequences for the major African, Asian, and European haplogroups. *Am. J. Hum. Genet.* *70*, 1152–1171. 10.1086/339933.
56. Kujanová, M., Pereira, L., Fernandes, V., Pereira, J.B., and Cerný, V. (2009). Near eastern neolithic genetic input in a small oasis of the Egyptian Western Desert. *Am. J. Phys. Anthropol.* *140*, 336–346. 10.1002/ajpa.21078.
57. Hernández, C.L., Soares, P., Dugoujon, J.M., Novelletto, A., Rodríguez, J.N., Rito, T., Oliveira, M., Melhaoui, M., Baali, A., Pereira, L., et al. (2015). Early Holocene and Historic mtDNA African Signatures in the Iberian Peninsula: The Andalusian Region as a Paradigm. *PLoS One* *10*, e0139784. 10.1371/journal.pone.0139784.
58. Barbieri, C., Vicente, M., Oliveira, S., Bostoen, K., Rocha, J., Stoneking, M., and Pakendorf, B. (2014). Migration and interaction in a contact zone: mtDNA variation among Bantu-speakers in Southern Africa. *PLoS One* *9*, e99117. 10.1371/journal.pone.0099117.
59. Pardiñas, A.F., Martínez, J.L., Roca, A., García-Vázquez, E., and López, B. (2014). Over the sands and far away: interpreting an Iberian mitochondrial lineage with ancient Western African origins. *Am. J. Hum. Biol.* *26*, 777–783. 10.1002/ajhb.22601.
60. Barbieri, C., Butthof, A., Bostoen, K., and Pakendorf, B. (2013). Genetic perspectives on the origin of clicks in Bantu languages from southwestern Zambia. *Eur. J. Hum. Genet.* *21*, 430–436. 10.1038/ejhg.2012.192.
61. Behar, D.M., Villemers, R., Soodyall, H., Blue-Smith, J., Pereira, L., Metspalu, E., Scozzari, R., Makkan, H., Tzur, S., Comas, D., et al. (2008). The dawn of human matrilineal diversity. *Am. J. Hum. Genet.* *82*, 1130–1140. 10.1016/j.ajhg.2008.04.002.
62. Collins, D.W., Gudiseva, H.V., Trachtman, B.T., Jerrehian, M., Gorry, T., Merritt, W.T., 3rd, Rhodes, A.L., Sankar, P.S., Regina, M., Miller-Ellis, E., et al. (2013). Mitochondrial sequence variation in African-American primary open-angle glaucoma patients. *PLoS One* *8*, e76627. 10.1371/journal.pone.0076627.

63. Seoane, M., Mosquera-Míguez, A., Gonzalez, T., Fraga, M., Salas, A., and Costoya, J.A. (2011). The mitochondrial genome is a "genetic sanctuary" during the oncogenic process. *PLoS One* 6, e23327. 10.1371/journal.pone.0023327.
64. Pennarun, E., Kivisild, T., Metspalu, E., Metspalu, M., Reisberg, T., Moisan, J.-P., Behar, D.M., Jones, S.C., and Villems, R. (2012). Divorcing the Late Upper Palaeolithic demographic histories of mtDNA haplogroups M1 and U6 in Africa. *BMC Evol. Biol.* 12, 234. 10.1186/1471-2148-12-234.
65. Maca-Meyer, N., González, A.M., Larruga, J.M., Flores, C., and Cabrera, V.M. (2001). Major genomic mitochondrial lineages delineate early human expansions. *BMC Genet.* 2, 13. 10.1186/1471-2156-2-13.
66. Larruga, J.M., Marrero, P., Abu-Amero, K.K., Golubenko, M.V., and Cabrera, V.M. (2017). Carriers of mitochondrial DNA macrohaplogroup R colonized Eurasia and Australasia from a southeast Asia core area. *BMC Evol. Biol.* 17, 115. 10.1186/s12862-017-0964-5.
67. Soini, H.K., Moilanen, J.S., Vilmi-Kerälä, T., Finnilä, S., and Majamaa, K. (2013). Mitochondrial DNA variant m.15218A > G in Finnish epilepsy patients who have maternal relatives with epilepsy, sensorineural hearing impairment or diabetes mellitus. *BMC Med. Genet.* 14, 73. 10.1186/1471-2350-14-73.
68. Montiel-Sosa, F., Ruiz-Pesini, E., Enríquez, J.A., Marcuello, A., Díez-Sánchez, C., Montoya, J., Wallace, D.C., and López-Pérez, M.J. (2006). Differences of sperm motility in mitochondrial DNA haplogroup U sublineages. *Gene* 368, 21–27. 10.1016/j.gene.2005.09.015.
69. Knipper, C., Mitnik, A., Massy, K., Kociumaka, C., Kucukkalipci, I., Maus, M., Wittenborn, F., Metz, S.E., Staskiewicz, A., Krause, J., et al. (2017). Female exogamy and gene pool diversification at the transition from the Final Neolithic to the Early Bronze Age in central Europe. *Proc. Natl. Acad. Sci. U. S. A.* 114, 10083–10088. 10.1073/pnas.1706355114.
70. Secher, B., Fregel, R., Larruga, J.M., Cabrera, V.M., Endicott, P., Pestano, J.J., and González, A.M. (2014). The history of the North African mitochondrial DNA haplogroup U6 gene flow into the African, Eurasian and American continents. *BMC Evol. Biol.* 14, 109. 10.1186/1471-2148-14-109.
71. Lippold, S., Xu, H., Ko, A., Li, M., Renaud, G., Butthof, A., Schröder, R., and Stoneking, M. (2014). Human paternal and maternal demographic histories: insights from high-resolution Y chromosome and mtDNA sequences. *Investig. Genet.* 5, 13. 10.1186/2041-2223-5-13.
72. Maca-Meyer, N., González, A.M., Pestano, J., Flores, C., Larruga, J.M., and Cabrera, V.M. (2003). Mitochondrial DNA transit between West Asia and North Africa inferred from U6 phylogeography. *BMC Genet.* 4, 15. 10.1186/1471-2156-4-15.
73. Olivieri, A., Achilli, A., Pala, M., Battaglia, V., Fornarino, S., Al-Zahery, N., Scozzari, R., Cruciani, F., Behar, D.M., Dugoujon, J.-M., et al. (2006). The mtDNA legacy of the Levantine early Upper Palaeolithic in Africa. *Science* 314, 1767–1770. 10.1126/science.1135566.
74. Achilli, A., Rengo, C., Battaglia, V., Pala, M., Olivieri, A., Fornarino, S., Magri, C., Scozzari, R., Babudri, N., Santachiara-Benerecetti, A.S., et al. (2005). Saami and Berbers—an unexpected mitochondrial DNA link. *Am. J. Hum. Genet.* 76, 883–886. 10.1086/430073.
75. Kloss-Brandstätter, A., Weissensteiner, H., Erhart, G., Schäfer, G., Forer, L., Schönherr, S., Pacher, D., Seifarth, C., Stöckl, A., Fendt, L., et al. (2015). Validation of Next-Generation Sequencing of Entire Mitochondrial Genomes and the Diversity of Mitochondrial DNA Mutations in Oral Squamous Cell Carcinoma. *PLoS One* 10, e0135643. 10.1371/journal.pone.0135643.
76. Chyleński, M., Ehler, E., Somel, M., Yaka, R., Krzewińska, M., Dabert, M., Juras, A., and Marciniak, A. (2019). Ancient Mitochondrial Genomes Reveal the Absence of Maternal Kinship in the Burials of Çatalhöyük People and Their Genetic Affinities. *Genes* 10, 3390/genes10030207.
77. Fernandes, V., Alshamali, F., Alves, M., Costa, M.D., Pereira, J.B., Silva, N.M., Cherni, L., Harich, N., Cerny, V., Soares, P., et al. (2012). The Arabian cradle: mitochondrial relicts of the first steps along the southern route out of Africa. *Am. J. Hum. Genet.* 90, 347–355. 10.1016/j.ajhg.2011.12.010.

**Table S3.** mtDNA haplogroups counts for current-day insular populations of Canary Islands. Related to the main text.

| Haplogroup | El Hierro | La Palma | La Gomera | Tenerife | Gran Canaria | Fuerteventura | Lanzarote | Total |
|------------|-----------|----------|-----------|----------|--------------|---------------|-----------|-------|
| A2ar1      | 0         | 0        | 0         | 0        | 1            | 0             | 0         | 1     |
| A2as1      | 0         | 0        | 0         | 0        | 0            | 1             | 0         | 1     |
| H          | 3         | 1        | 0         | 3        | 18           | 0             | 0         | 25    |
| H+152      | 0         | 0        | 0         | 0        | 6            | 0             | 0         | 6     |
| H1         | 0         | 0        | 0         | 1        | 7            | 0             | 1         | 9     |
| H1+152     | 0         | 0        | 1         | 0        | 2            | 0             | 0         | 3     |
| H1+16189   | 0         | 0        | 2         | 0        | 0            | 1             | 0         | 3     |
| H11a       | 0         | 0        | 0         | 1        | 0            | 0             | 0         | 1     |
| H13a1b     | 0         | 0        | 0         | 0        | 0            | 1             | 0         | 1     |
| H14b2a     | 0         | 0        | 0         | 1        | 0            | 0             | 0         | 1     |
| H1a1       | 0         | 1        | 0         | 0        | 0            | 0             | 0         | 1     |
| H1a3       | 0         | 0        | 0         | 1        | 0            | 0             | 0         | 1     |
| H1ao1      | 3         | 0        | 0         | 0        | 0            | 0             | 0         | 3     |
| H1ap1      | 0         | 0        | 1         | 1        | 0            | 0             | 1         | 3     |
| H1au       | 0         | 0        | 0         | 0        | 0            | 0             | 1         | 1     |
| H1b        | 0         | 4        | 0         | 1        | 0            | 0             | 0         | 5     |
| H1bb       | 0         | 0        | 0         | 0        | 0            | 1             | 0         | 1     |
| H1br       | 0         | 0        | 0         | 2        | 3            | 0             | 0         | 5     |
| H1bs       | 0         | 0        | 1         | 1        | 0            | 0             | 0         | 2     |
| H1bv1      | 0         | 0        | 0         | 0        | 1            | 0             | 0         | 1     |
| H1bw       | 0         | 0        | 1         | 2        | 0            | 0             | 0         | 3     |
| H1c3       | 0         | 0        | 0         | 0        | 1            | 0             | 0         | 1     |
| H1c3a      | 0         | 0        | 0         | 1        | 0            | 0             | 0         | 1     |
| H1c4       | 0         | 1        | 0         | 0        | 0            | 0             | 0         | 1     |
| H1cf       | 0         | 1        | 2         | 7        | 3            | 5             | 6         | 24    |
| H1e        | 0         | 1        | 0         | 0        | 0            | 0             | 0         | 1     |
| H1e1       | 0         | 0        | 0         | 2        | 0            | 0             | 0         | 2     |
| H1e1a      | 1         | 0        | 3         | 2        | 8            | 4             | 5         | 23    |
| H1h1       | 0         | 1        | 0         | 0        | 0            | 0             | 0         | 1     |
| H1j        | 0         | 0        | 0         | 1        | 0            | 0             | 0         | 1     |
| H1n6       | 0         | 0        | 0         | 1        | 0            | 0             | 0         | 1     |
| H1q        | 0         | 0        | 0         | 2        | 0            | 0             | 0         | 2     |
| H1q2       | 0         | 0        | 0         | 0        | 1            | 0             | 0         | 1     |
| H1t        | 2         | 0        | 0         | 0        | 1            | 0             | 0         | 3     |
| H1u        | 0         | 0        | 0         | 4        | 0            | 0             | 0         | 4     |
| H1v        | 0         | 0        | 0         | 1        | 0            | 0             | 1         | 2     |
| H20a1a     | 0         | 0        | 0         | 0        | 2            | 0             | 0         | 2     |
| H24        | 0         | 0        | 0         | 0        | 0            | 2             | 0         | 2     |
| H27        | 0         | 0        | 0         | 0        | 1            | 0             | 0         | 1     |
| H2a1+146   | 0         | 0        | 0         | 0        | 4            | 0             | 0         | 4     |
| H2a5a      | 0         | 2        | 0         | 0        | 0            | 0             | 0         | 2     |
| H3         | 0         | 0        | 0         | 0        | 1            | 1             | 0         | 2     |
| H3+152     | 0         | 0        | 0         | 0        | 1            | 0             | 1         | 2     |
| H30a       | 0         | 0        | 0         | 2        | 0            | 0             | 0         | 2     |
| H3an       | 0         | 0        | 0         | 0        | 0            | 0             | 1         | 1     |
| H3ap       | 0         | 0        | 0         | 3        | 0            | 0             | 0         | 3     |
| H3b1b1     | 0         | 0        | 0         | 0        | 1            | 0             | 0         | 1     |
| H3c        | 1         | 0        | 1         | 1        | 0            | 0             | 0         | 3     |
| H3c2       | 0         | 0        | 0         | 0        | 4            | 0             | 0         | 4     |
| H3g        | 0         | 1        | 0         | 0        | 0            | 0             | 0         | 1     |
| H3k        | 0         | 0        | 0         | 1        | 0            | 0             | 0         | 1     |
| H3r        | 0         | 0        | 3         | 2        | 3            | 0             | 0         | 8     |
| H3w        | 0         | 0        | 0         | 3        | 0            | 0             | 0         | 3     |
| H41        | 0         | 0        | 0         | 2        | 0            | 0             | 0         | 2     |
| H43        | 0         | 0        | 0         | 2        | 0            | 0             | 0         | 2     |
| H4a1a3a    | 0         | 0        | 0         | 0        | 2            | 0             | 0         | 2     |
| H4a1c2     | 0         | 0        | 0         | 0        | 1            | 0             | 0         | 1     |
| H5         | 0         | 0        | 0         | 0        | 1            | 0             | 0         | 1     |
| H5a1j      | 0         | 0        | 0         | 0        | 1            | 0             | 0         | 1     |
| H5a2       | 0         | 0        | 0         | 1        | 0            | 0             | 0         | 1     |
| H5a3a1     | 0         | 0        | 0         | 0        | 1            | 0             | 0         | 1     |
| H5b        | 0         | 0        | 0         | 0        | 2            | 0             | 0         | 2     |
| H6a1a      | 0         | 4        | 0         | 2        | 0            | 0             | 2         | 8     |
| H6a1a7     | 0         | 0        | 0         | 0        | 2            | 0             | 0         | 2     |
| H6a1b2     | 1         | 0        | 1         | 2        | 1            | 0             | 0         | 5     |
| H7         | 2         | 0        | 0         | 7        | 2            | 1             | 0         | 12    |
| H71        | 1         | 0        | 0         | 0        | 0            | 0             | 0         | 1     |
| HV+16311   | 1         | 0        | 0         | 0        | 0            | 0             | 3         | 4     |
| HV0+195    | 0         | 1        | 0         | 0        | 2            | 0             | 0         | 3     |
| HV0g       | 0         | 0        | 1         | 1        | 0            | 0             | 0         | 2     |
| HV9        | 0         | 1        | 0         | 0        | 0            | 0             | 0         | 1     |
| I          | 0         | 0        | 2         | 0        | 0            | 0             | 0         | 2     |
| I1a1       | 0         | 0        | 1         | 0        | 0            | 3             | 0         | 4     |
| I2c        | 0         | 0        | 0         | 1        | 0            | 0             | 0         | 1     |
| I3a        | 0         | 0        | 0         | 0        | 6            | 0             | 0         | 6     |
| J1b1a1f    | 0         | 0        | 0         | 0        | 0            | 1             | 0         | 1     |
| J1b1b1d    | 0         | 0        | 0         | 1        | 0            | 0             | 0         | 1     |
| J1c15      | 0         | 0        | 0         | 1        | 0            | 0             | 0         | 1     |
| J1c1b      | 0         | 4        | 0         | 0        | 1            | 0             | 0         | 5     |
| J1c2       | 0         | 0        | 0         | 0        | 1            | 0             | 3         | 4     |
| J1c2a1     | 0         | 2        | 0         | 0        | 0            | 0             | 0         | 2     |
| J1c2a3     | 0         | 1        | 0         | 0        | 0            | 0             | 0         | 1     |
| J1c2c1     | 0         | 0        | 0         | 1        | 0            | 0             | 0         | 1     |
| J1c2c3     | 0         | 0        | 0         | 0        | 0            | 1             | 2         | 3     |
| J1c2e2     | 0         | 0        | 0         | 2        | 0            | 0             | 0         | 2     |
| J1c2h      | 0         | 0        | 0         | 1        | 0            | 0             | 0         | 1     |
| J1c5a      | 0         | 0        | 0         | 0        | 1            | 0             | 0         | 1     |
| J1c7       | 0         | 0        | 0         | 3        | 0            | 0             | 0         | 3     |
| J2a1a1     | 0         | 3        | 0         | 1        | 0            | 0             | 0         | 4     |
| J2a1a1e    | 0         | 0        | 0         | 0        | 1            | 0             | 0         | 1     |
| J2a2d1a    | 26        | 3        | 8         | 3        | 17           | 1             | 6         | 64    |
| J2b1a2     | 0         | 0        | 0         | 1        | 0            | 0             | 0         | 1     |
| J2b1a2a    | 0         | 0        | 1         | 0        | 0            | 0             | 0         | 1     |
| K1a        | 5         | 0        | 0         | 2        | 0            | 0             | 3         | 10    |
| K1a14      | 0         | 0        | 0         | 0        | 1            | 0             | 0         | 1     |
| K1a1b1     | 0         | 0        | 0         | 0        | 5            | 0             | 0         | 5     |
| K1a1b1c    | 0         | 0        | 0         | 4        | 0            | 0             | 0         | 4     |

|                |    |   |    |   |    |   |    |     |
|----------------|----|---|----|---|----|---|----|-----|
| K1a4a1         | 0  | 1 | 3  | 6 | 0  | 0 | 6  | 16  |
| K1a4a2a        | 0  | 0 | 1  | 0 | 3  | 0 | 0  | 4   |
| K1a4f1         | 0  | 0 | 0  | 0 | 1  | 0 | 0  | 1   |
| K1b1a1c        | 0  | 0 | 0  | 1 | 1  | 0 | 0  | 2   |
| K1b1a2         | 2  | 0 | 0  | 0 | 0  | 0 | 1  | 3   |
| K2b1a1a        | 0  | 0 | 0  | 0 | 4  | 0 | 0  | 4   |
| L0a1a1         | 0  | 0 | 0  | 0 | 1  | 0 | 0  | 1   |
| L0a1a3         | 0  | 0 | 1  | 0 | 0  | 0 | 0  | 1   |
| L1b1a          | 0  | 0 | 0  | 0 | 2  | 0 | 0  | 2   |
| L1b1a10        | 0  | 0 | 0  | 0 | 2  | 1 | 0  | 3   |
| L1b1a2a        | 0  | 0 | 0  | 0 | 1  | 0 | 0  | 1   |
| L1b1a6         | 0  | 1 | 0  | 0 | 0  | 0 | 0  | 1   |
| L1c3a1a        | 0  | 0 | 0  | 1 | 0  | 0 | 1  | 2   |
| L1c3b1         | 0  | 0 | 0  | 0 | 3  | 0 | 0  | 3   |
| L2a1+143+16189 | 0  | 0 | 0  | 0 | 0  | 1 | 0  | 1   |
| L2a1a2b        | 0  | 0 | 2  | 0 | 0  | 0 | 0  | 2   |
| L2a1a3b        | 0  | 0 | 0  | 0 | 1  | 0 | 0  | 1   |
| L2a1c          | 0  | 0 | 1  | 1 | 2  | 1 | 3  | 8   |
| L2a1c3a        | 0  | 0 | 0  | 1 | 0  | 0 | 0  | 1   |
| L2a1c4         | 1  | 3 | 4  | 2 | 0  | 0 | 3  | 13  |
| L2a1f1         | 0  | 0 | 0  | 0 | 0  | 0 | 2  | 2   |
| L2e            | 0  | 0 | 0  | 0 | 1  | 0 | 0  | 1   |
| L3b1a+@16124   | 0  | 2 | 0  | 2 | 1  | 0 | 0  | 5   |
| L3b1a5         | 0  | 0 | 0  | 0 | 1  | 0 | 0  | 1   |
| L3b1a9         | 0  | 0 | 0  | 2 | 0  | 0 | 0  | 2   |
| L3b2a          | 0  | 0 | 0  | 1 | 0  | 0 | 0  | 1   |
| L3d1'2'3'4'5'6 | 0  | 0 | 0  | 0 | 1  | 0 | 0  | 1   |
| L3d1b1         | 0  | 0 | 0  | 0 | 1  | 1 | 0  | 2   |
| L3d1b3a        | 0  | 0 | 2  | 0 | 0  | 0 | 0  | 2   |
| L3e1           | 0  | 0 | 0  | 3 | 0  | 0 | 0  | 3   |
| L3e1e          | 0  | 1 | 1  | 1 | 0  | 1 | 0  | 4   |
| L3e3a          | 0  | 0 | 1  | 0 | 0  | 0 | 0  | 1   |
| L3e4a          | 0  | 0 | 0  | 0 | 2  | 0 | 0  | 2   |
| L3f1b1a        | 0  | 0 | 0  | 2 | 0  | 0 | 0  | 2   |
| L3f1b6         | 0  | 1 | 0  | 0 | 0  | 0 | 0  | 1   |
| L3x2b          | 0  | 1 | 0  | 1 | 0  | 0 | 0  | 2   |
| M1b1a          | 0  | 0 | 0  | 0 | 2  | 0 | 4  | 6   |
| T1a            | 1  | 0 | 11 | 0 | 2  | 2 | 5  | 21  |
| T1a1           | 0  | 0 | 1  | 3 | 0  | 0 | 0  | 4   |
| T1a2a          | 0  | 5 | 0  | 0 | 0  | 0 | 0  | 5   |
| T1a6           | 0  | 0 | 0  | 3 | 0  | 0 | 0  | 3   |
| T2a1b1a2       | 0  | 0 | 0  | 1 | 0  | 0 | 0  | 1   |
| T2b            | 0  | 0 | 0  | 0 | 1  | 0 | 0  | 1   |
| T2b+152        | 0  | 3 | 0  | 0 | 1  | 0 | 1  | 5   |
| T2b11          | 0  | 0 | 0  | 1 | 0  | 0 | 0  | 1   |
| T2b3+151       | 0  | 1 | 1  | 3 | 0  | 0 | 2  | 7   |
| T2b4+152       | 0  | 3 | 0  | 1 | 0  | 0 | 0  | 4   |
| T2c1+146       | 0  | 0 | 1  | 0 | 9  | 1 | 0  | 11  |
| T2c1a          | 1  | 0 | 0  | 0 | 0  | 0 | 0  | 1   |
| T2c1a2         | 1  | 1 | 0  | 2 | 0  | 0 | 0  | 4   |
| T2c1d1c        | 2  | 1 | 2  | 0 | 1  | 2 | 14 | 22  |
| T2c1d2         | 6  | 0 | 1  | 6 | 10 | 0 | 1  | 24  |
| T2e1           | 0  | 0 | 0  | 1 | 0  | 0 | 0  | 1   |
| T2f2           | 0  | 0 | 0  | 1 | 0  | 0 | 0  | 1   |
| U2e1a1         | 0  | 0 | 0  | 2 | 0  | 0 | 0  | 2   |
| U2e1b1         | 0  | 0 | 0  | 0 | 5  | 0 | 0  | 5   |
| U2e2a1a        | 0  | 3 | 0  | 0 | 0  | 0 | 0  | 3   |
| U3a1           | 1  | 0 | 1  | 0 | 0  | 0 | 0  | 2   |
| U4a1a          | 0  | 0 | 0  | 0 | 2  | 0 | 0  | 2   |
| U4a2a          | 0  | 0 | 0  | 0 | 3  | 0 | 0  | 3   |
| U4b3           | 0  | 0 | 0  | 0 | 1  | 0 | 0  | 1   |
| U4c1           | 3  | 2 | 1  | 1 | 0  | 1 | 0  | 8   |
| U5a1a1m        | 0  | 0 | 0  | 1 | 0  | 0 | 0  | 1   |
| U5a1a2a        | 0  | 2 | 0  | 0 | 0  | 0 | 0  | 2   |
| U5a1b4         | 11 | 0 | 0  | 0 | 0  | 0 | 0  | 11  |
| U5a1d2a        | 0  | 0 | 0  | 0 | 1  | 0 | 0  | 1   |
| U5a2a1         | 0  | 1 | 0  | 3 | 0  | 0 | 0  | 4   |
| U5a2b          | 0  | 0 | 0  | 1 | 0  | 0 | 0  | 1   |
| U5b1b1         | 0  | 0 | 0  | 0 | 1  | 0 | 0  | 1   |
| U5b1b1+@16192  | 0  | 1 | 0  | 1 | 0  | 0 | 0  | 2   |
| U5b1e          | 0  | 0 | 4  | 0 | 1  | 2 | 0  | 7   |
| U5b1f1         | 0  | 0 | 0  | 2 | 1  | 1 | 0  | 4   |
| U5b1g          | 0  | 0 | 1  | 0 | 0  | 0 | 0  | 1   |
| U5b2a+@16192   | 0  | 0 | 1  | 1 | 0  | 0 | 0  | 2   |
| U5b2a1a        | 0  | 0 | 0  | 0 | 3  | 0 | 0  | 3   |
| U5b2b3a        | 0  | 4 | 0  | 1 | 0  | 0 | 0  | 5   |
| U6a1a1         | 0  | 0 | 0  | 1 | 0  | 0 | 0  | 1   |
| U6a3a1         | 0  | 0 | 1  | 4 | 0  | 0 | 1  | 6   |
| U6a3b          | 0  | 0 | 1  | 0 | 0  | 0 | 0  | 1   |
| U6a5           | 0  | 0 | 0  | 0 | 1  | 0 | 0  | 1   |
| U6a6b1         | 0  | 0 | 0  | 0 | 0  | 0 | 1  | 1   |
| U6a7a1         | 0  | 4 | 0  | 1 | 0  | 0 | 0  | 5   |
| U6a7b1         | 0  | 2 | 0  | 0 | 0  | 0 | 0  | 2   |
| U6b1a          | 19 | 7 | 50 | 7 | 15 | 7 | 21 | 126 |
| U6b1a1         | 5  | 7 | 11 | 4 | 4  | 1 | 4  | 36  |
| U6b3a          | 0  | 0 | 1  | 0 | 0  | 0 | 0  | 1   |
| U6c1           | 0  | 1 | 1  | 4 | 2  | 3 | 1  | 12  |
| V              | 5  | 0 | 0  | 0 | 0  | 0 | 0  | 5   |
| V+@16298       | 0  | 2 | 0  | 0 | 1  | 0 | 0  | 3   |
| V+@72          | 0  | 0 | 0  | 1 | 0  | 0 | 0  | 1   |
| V17            | 0  | 1 | 0  | 0 | 0  | 1 | 0  | 2   |
| V2             | 0  | 0 | 0  | 4 | 0  | 0 | 0  | 4   |
| V20            | 0  | 0 | 1  | 0 | 0  | 0 | 3  | 4   |
| V3a1           | 0  | 0 | 0  | 1 | 0  | 0 | 0  | 1   |
| V9             | 0  | 0 | 0  | 0 | 1  | 0 | 1  | 2   |
| W1e1           | 0  | 3 | 0  | 0 | 0  | 0 | 0  | 3   |
| W5a1a          | 0  | 1 | 0  | 1 | 0  | 0 | 0  | 2   |
| W6a            | 0  | 0 | 0  | 1 | 0  | 3 | 0  | 4   |
| X2b+226        | 1  | 0 | 0  | 2 | 0  | 0 | 0  | 3   |
| X2c1j          | 1  | 2 | 0  | 0 | 0  | 0 | 0  | 3   |
| X2d2           | 0  | 0 | 0  | 0 | 1  | 0 | 0  | 1   |
| X3a            | 0  | 2 | 0  | 0 | 1  | 0 | 0  | 3   |

**Table S4.** mtDNA-based pairwise matches between current-day insular populations and their putative continental colonizers (%). Related to the main text.

| Islands       | Galicia | Portugal | Andalusia | Basque Country | Other | Iberia | Italy | North Africa | Atlantic | sub-Saharan Africa |
|---------------|---------|----------|-----------|----------------|-------|--------|-------|--------------|----------|--------------------|
| El Hierro     | 2(17)   | 5(41)    | 3(25)     | 2(17)          | 0     | 12(50) | 2(8)  | 2(8)         | 7(29)    | 1(4)               |
| La Palma      | 6(33)   | 2(11)    | 3(17)     | 4(22)          | 3(17) | 18(43) | 4(10) | 6(14)        | 10(24)   | 4(9)               |
| La Gomera     | 3(21)   | 4(29)    | 2(15)     | 3(21)          | 2(14) | 14(35) | 3(7)  | 9(23)        | 8(20)    | 6(15)              |
| Tenerife      | 6(18)   | 11(33)   | 6(18)     | 4(12)          | 6(18) | 33(41) | 6(7)  | 19(23)       | 15(19)   | 8(10)              |
| Gran Canaria  | 9(28)   | 7(22)    | 5(16)     | 6(19)          | 5(15) | 32(35) | 9(10) | 18(20)       | 14(15)   | 18(20)             |
| Fuerteventura | 3(23)   | 3(23)    | 3(23)     | 3(23)          | 1(8)  | 13(45) | 1(3)  | 6(21)        | 4(14)    | 5(17)              |
| Lanzarote     | 1(10)   | 4(40)    | 2(20)     | 1(10)          | 2(20) | 9(25)  | 3(8)  | 15(42)       | 5(14)    | 4(11)              |
| Average       | 21.43   | 28.43    | 19.14     | 17.71          | 13.14 | 39.14  | 7.57  | 21.57        | 19.29    | 12.29              |
| SD            | 7.55    | 10.71    | 3.72      | 5.02           | 6.94  | 8.21   | 2.37  | 10.53        | 5.65     | 5.41               |

**Table S5.** Coalescence ages for the putative autochthonous Canarian mtDNA lineages calculated using two approaches, the rho statistic and Bayesian inference (Beast). For the rho statistic, two alternative mtDNA substitution rates were applied, 1) Soares et al. (2009) and 2) Cabrera et al. (2021). For Beast, only the latter mtDNA substitution rate was used. Related to the main text.

| Lineages    | Rho 1)      |           | Rho 2)      |             |           | Beast 2)    |             |          |
|-------------|-------------|-----------|-------------|-------------|-----------|-------------|-------------|----------|
|             | Age (years) | 95% CI    | Lineages    | Age (years) | 95% CI    | Lineages    | Age (years) | 95% CI   |
| H1e1a       | 5869        | 5785-5953 | H1e1a       | 2268        | 2235-2300 | J2a2d1a     | 1628        | 841-2556 |
| J2a2d1a     | 5047        | 4970-5125 | J2a2d1a     | 1949        | 1919-1979 | H1e1a       | 1511        | 605-2654 |
| H1cf        | 4416        | 4353-4479 | H1cf        | 1707        | 1683-1732 | H1cf        | 1365        | 507-2311 |
| U6c1        | 4266        | 4196-4337 | U6c1        | 1649        | 1622-1677 | U6c1        | 1291        | 392-2477 |
| U6b1a       | 4152        | 4092-4212 | U6b1a       | 1602        | 1579-1625 | X3a         | 1238        | 216-2589 |
| X3a         | 2245        | 2212-2277 | X3a         | 867         | 854-879   | T2c1d2      | 1105        | 437-1890 |
| T2c1d2      | 1481        | 1464-1498 | T2c1d2      | 572         | 551-588   | U6b1a       | 827         | 407-1306 |
| H4a1+16362  | 1474        | 1426-1522 | H4a1+16362  | 569         | 566-579   | H4a1+16362  | 405         | 0-1236   |
| L3b1a-16124 | 982         | 958-1006  | L3b1a-16124 | 380         | 370-389   | L3b1a-16124 | 297         | 0-906    |
